# Supplementary material for: Pathogenic role of human C-reactive protein in diabetic retinopathy
Source: Oxford University Press journal article supplement (doi:10.1042/cs20200085), 2020-06-30
Supplement: cs-2020-0085_supp.pdf [file cs-2020-0085_supp.pdf]

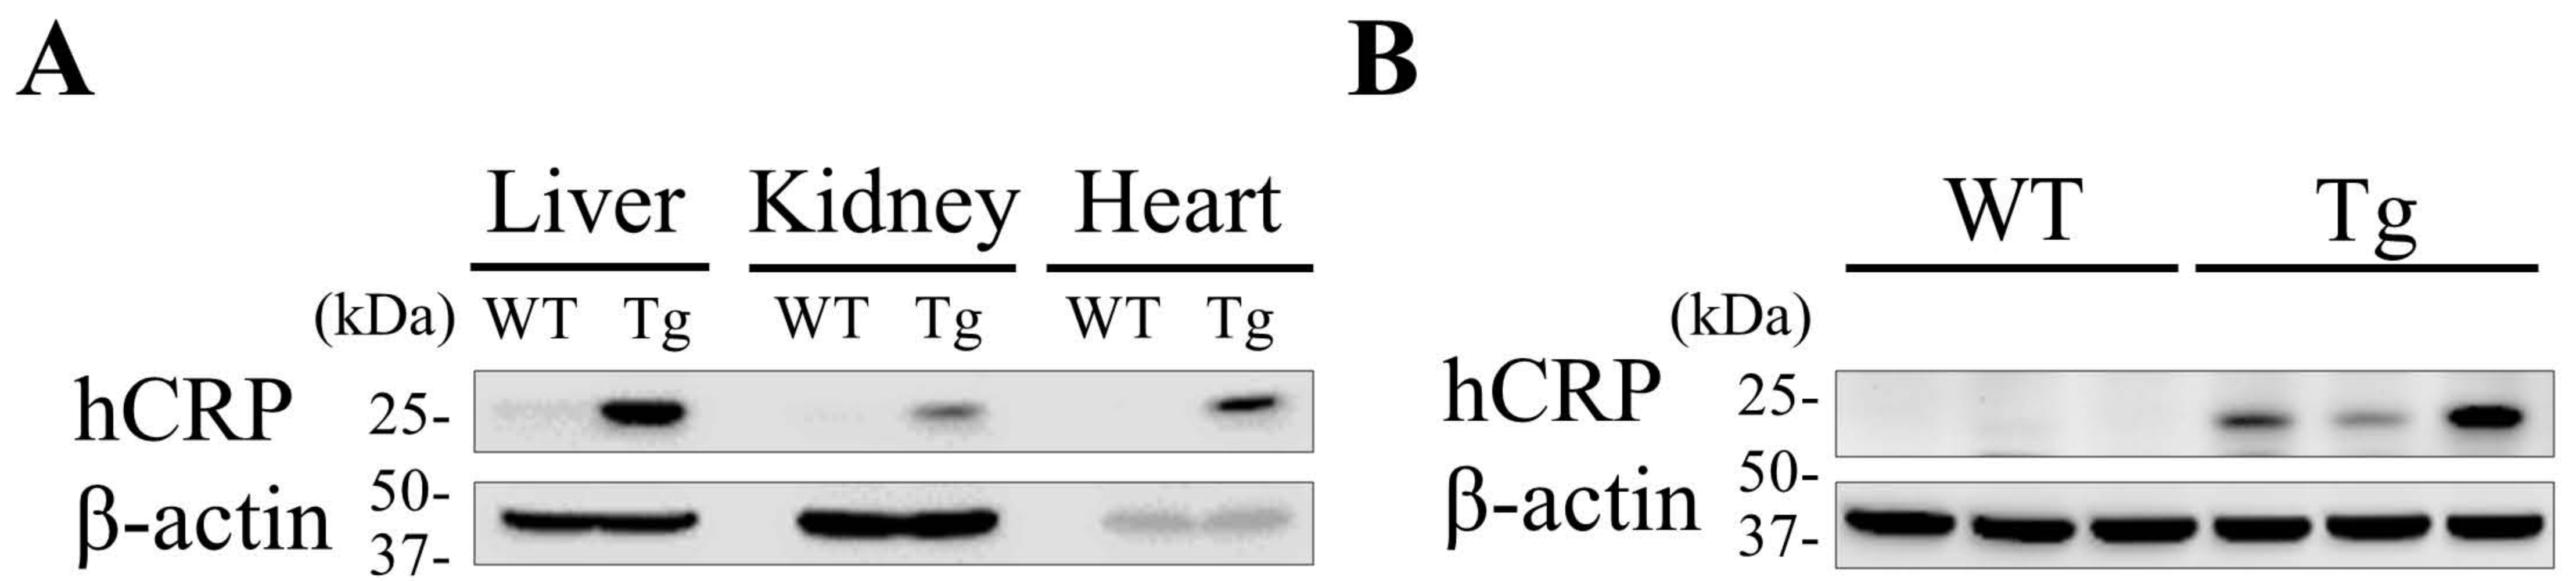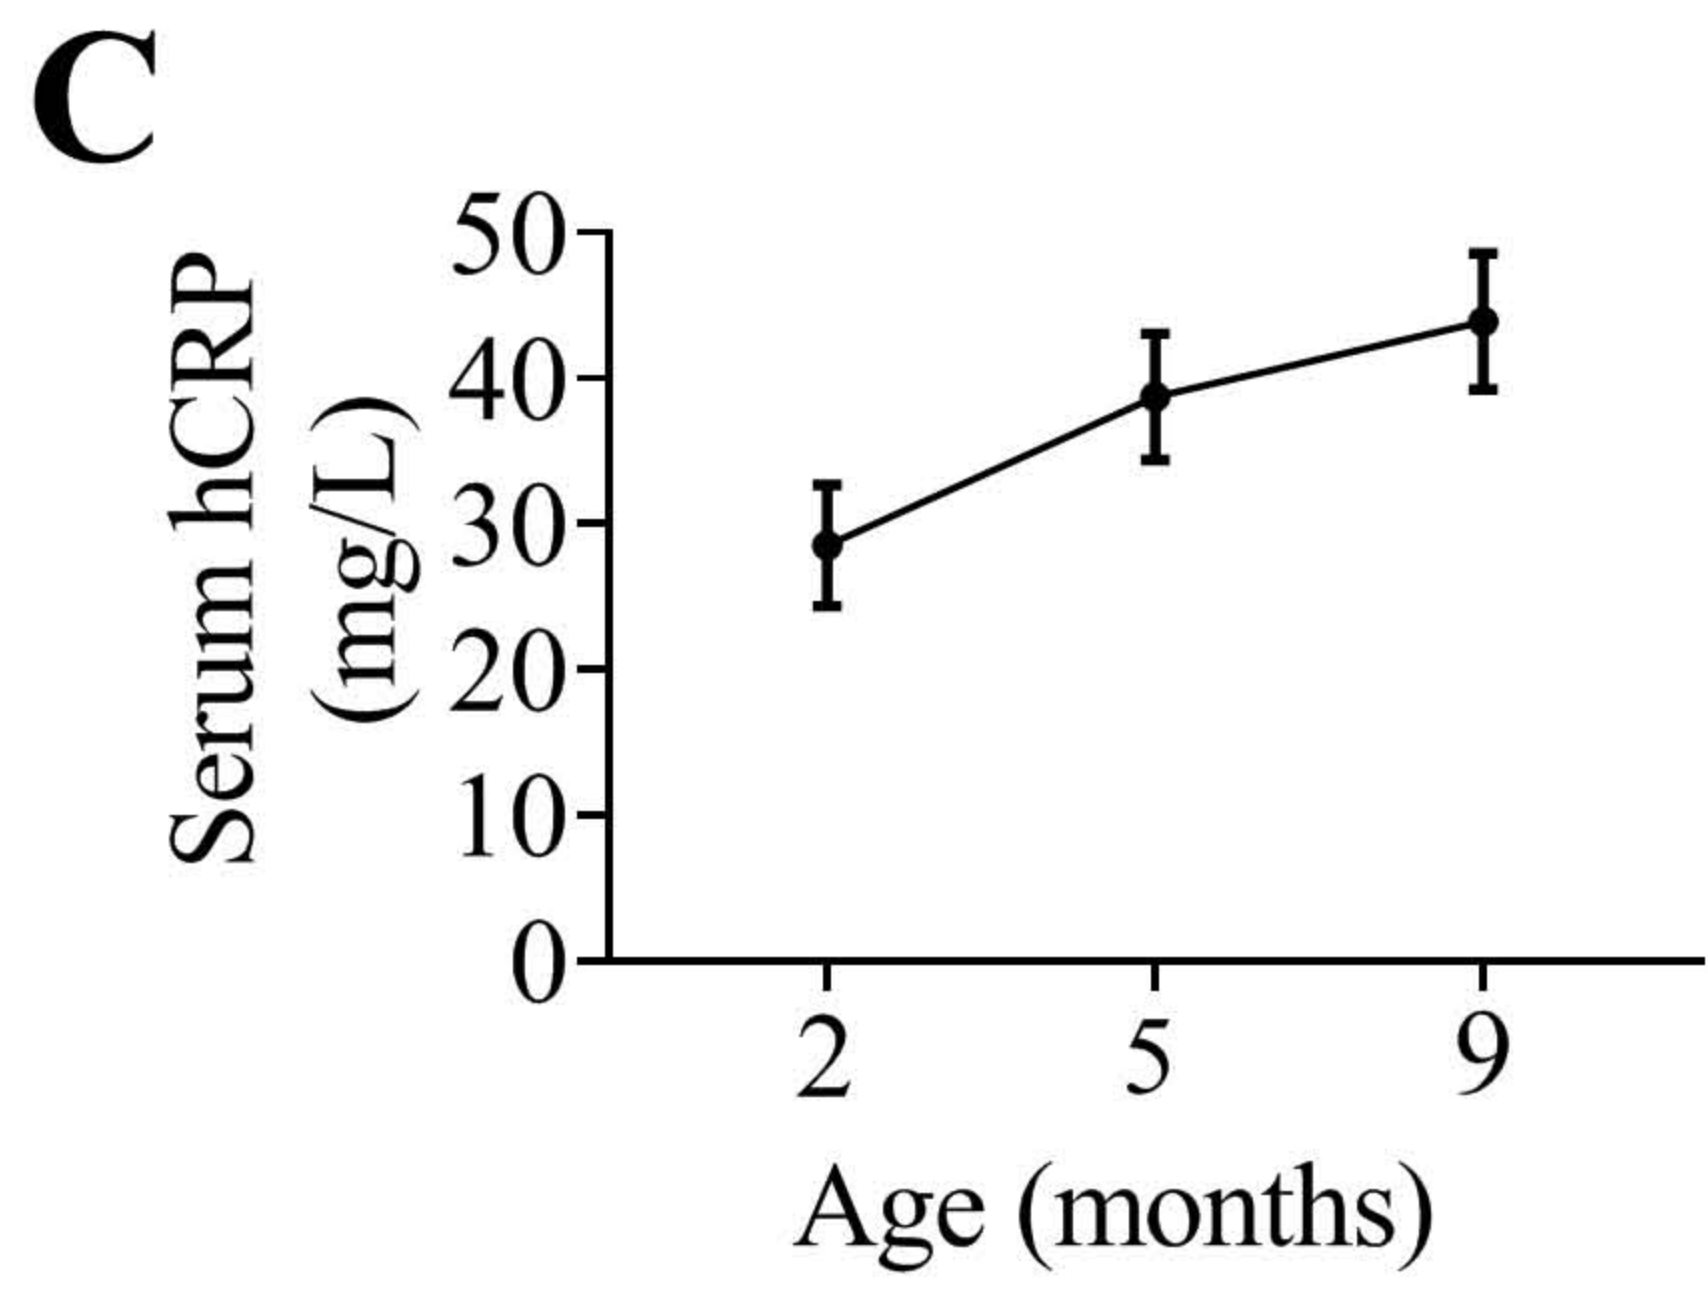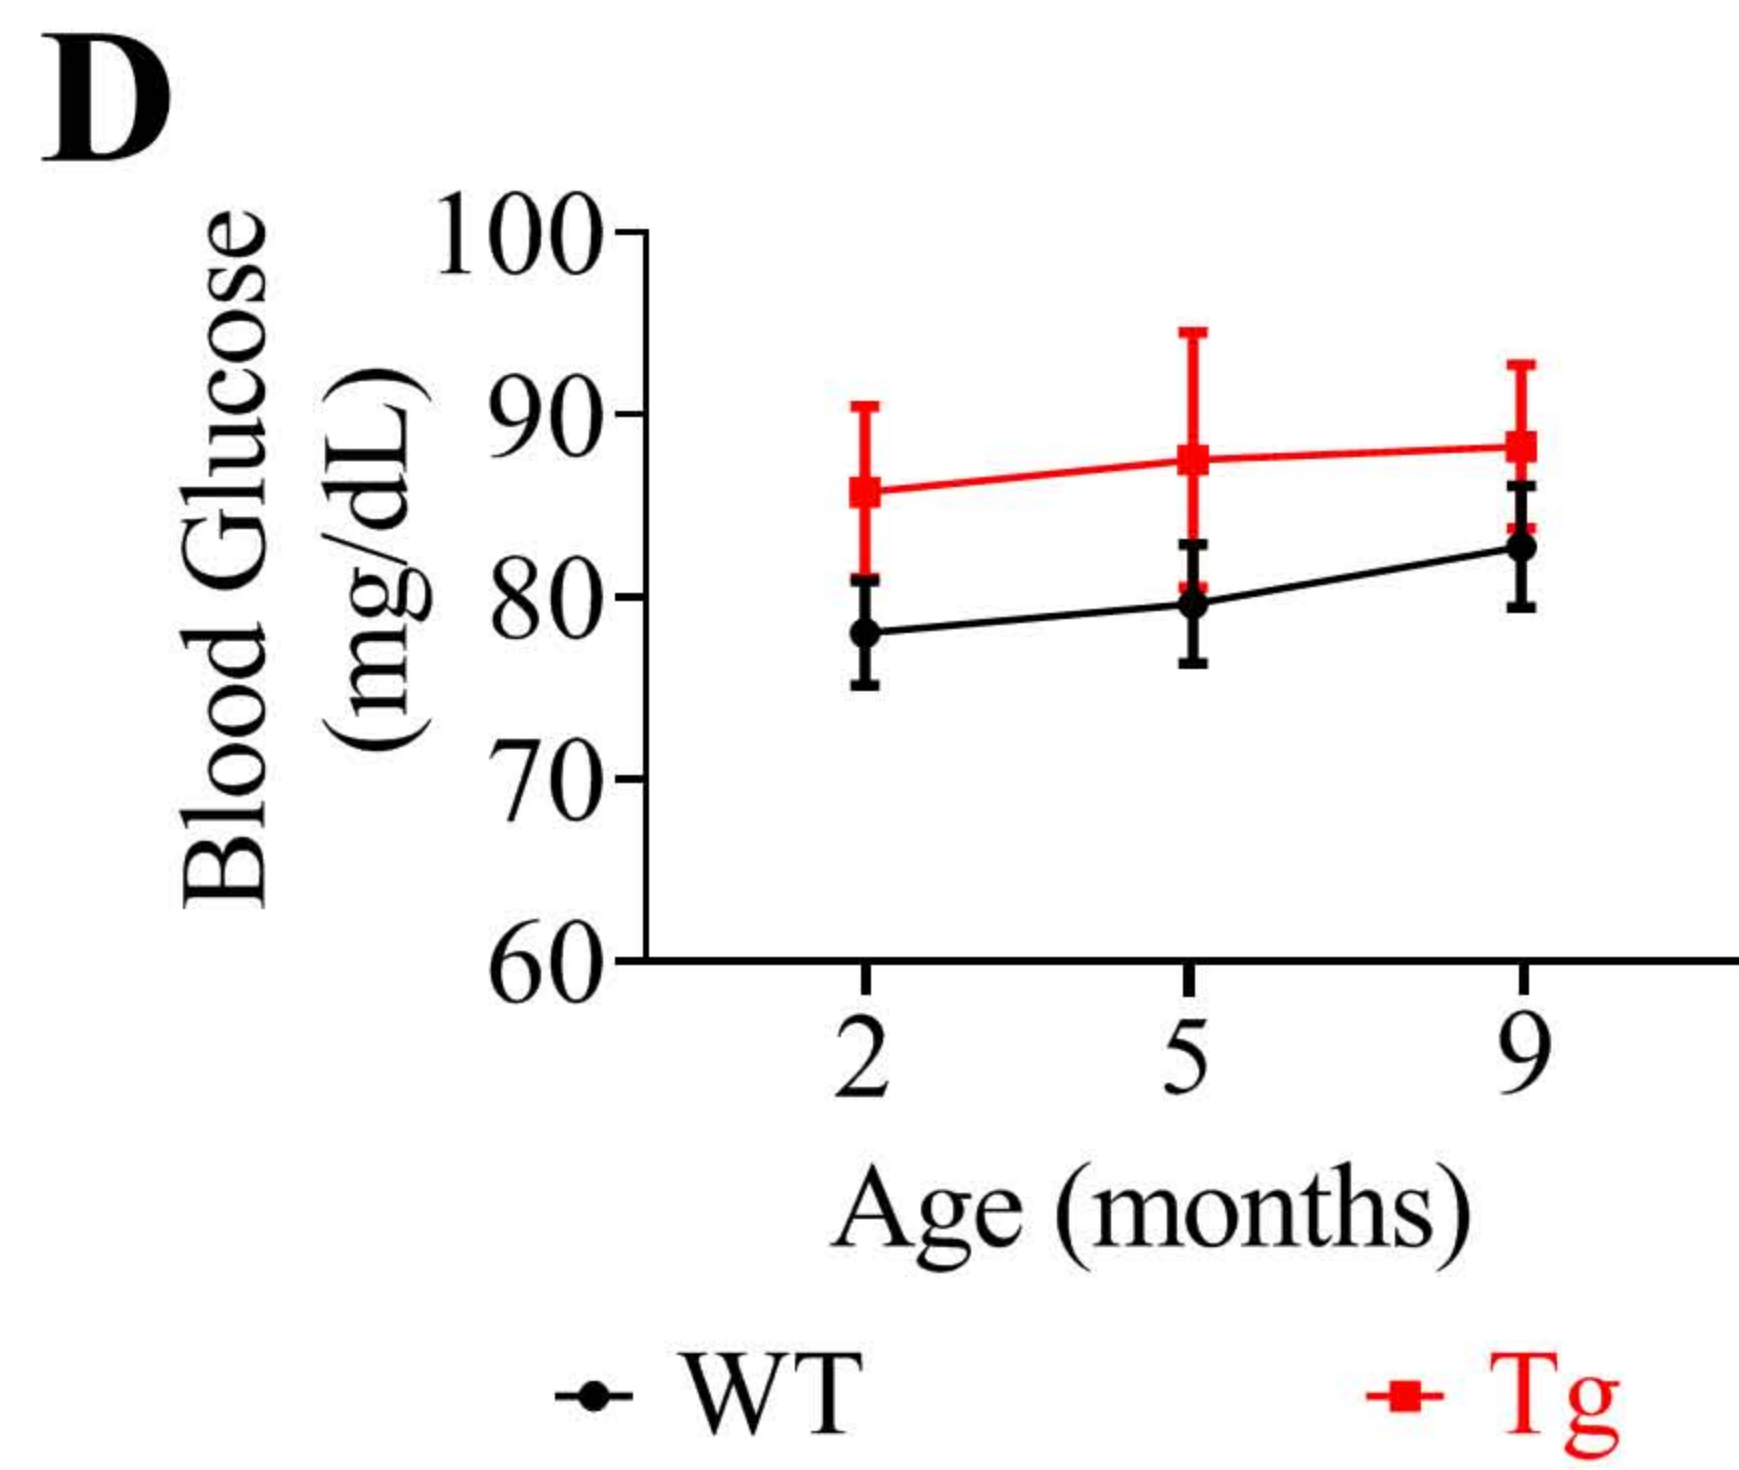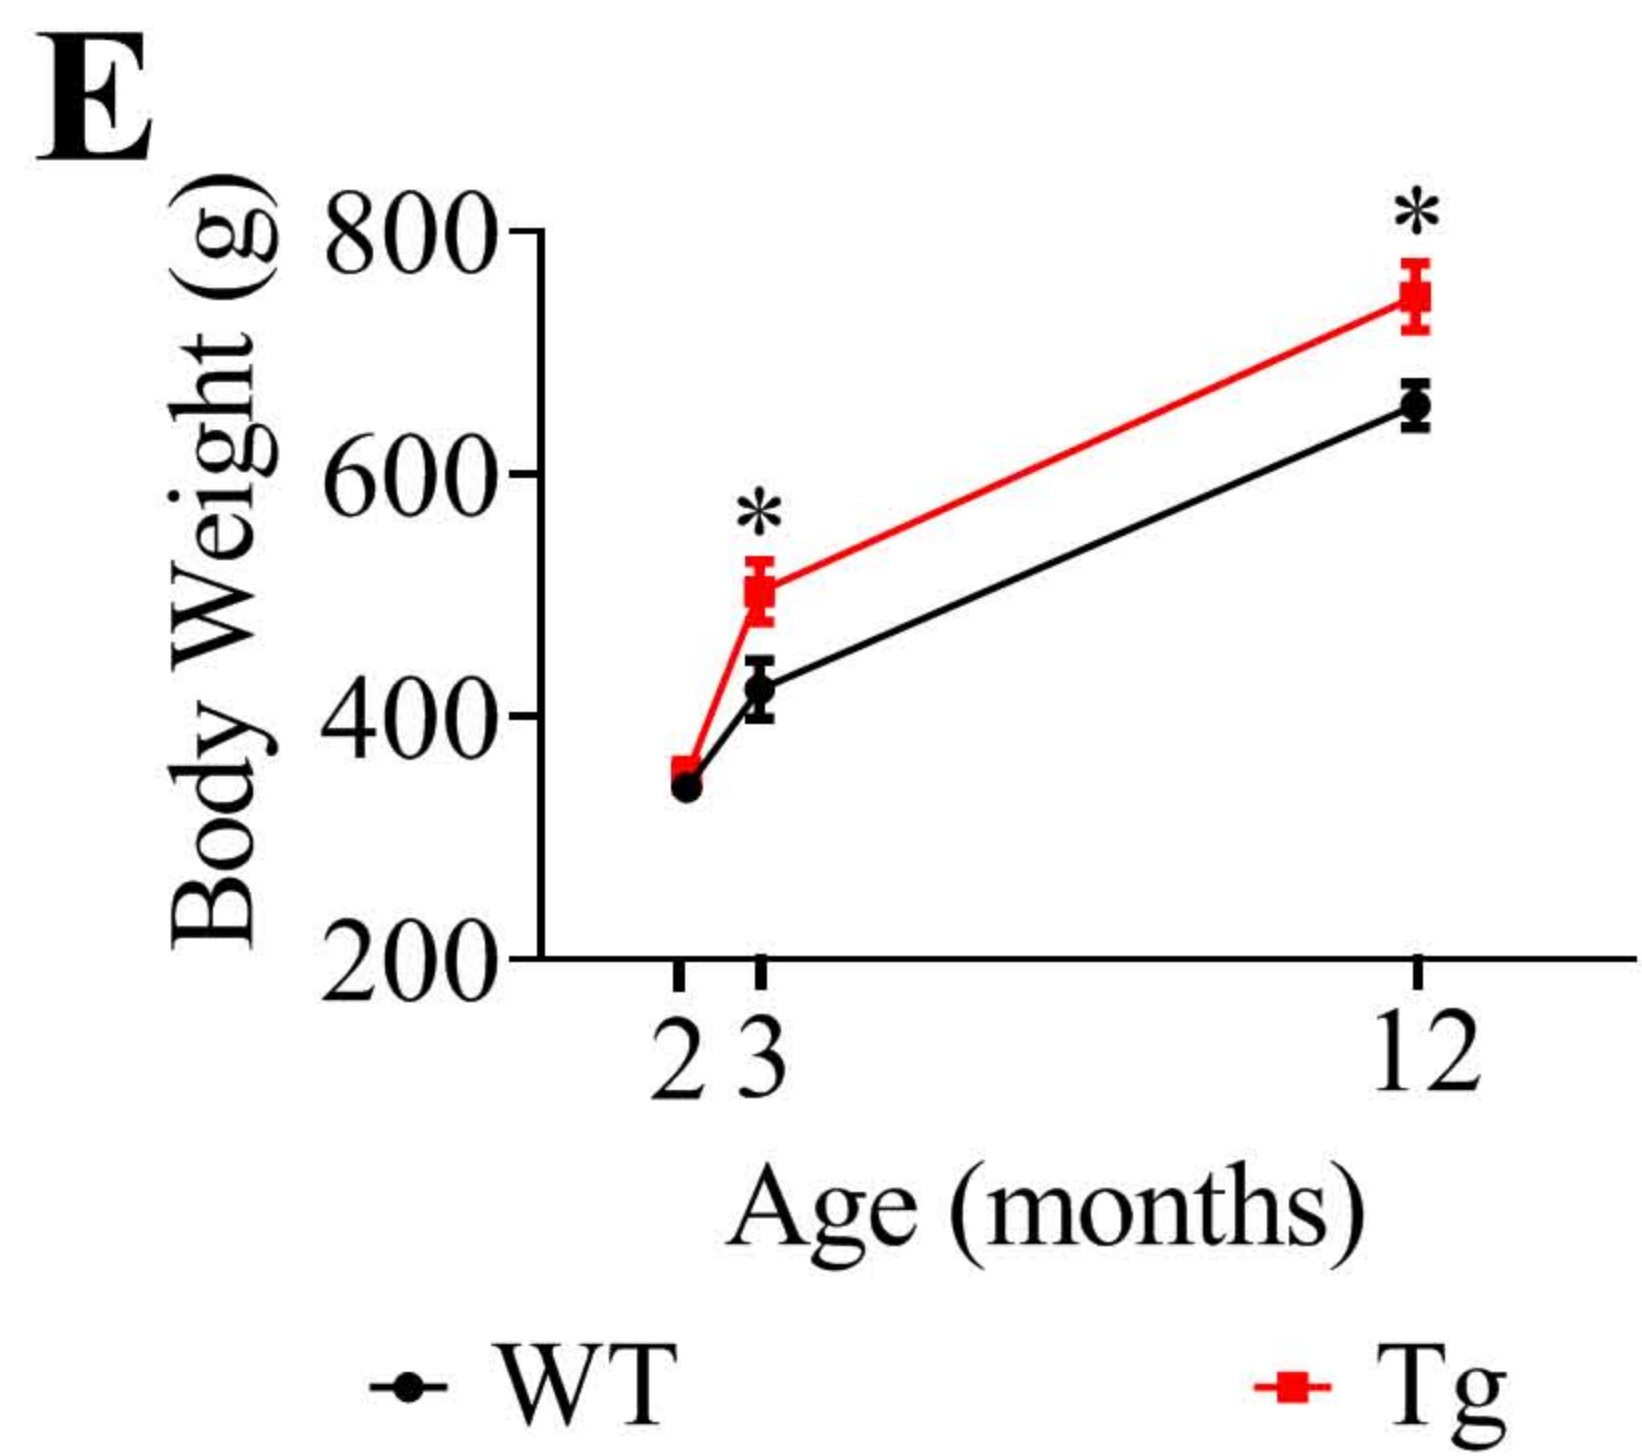

**Supplementary Figure 1. Levels of hCRP in the serum and tissues, body weight and blood glucose in age-matched WT rats and hCRP-Tg rats.** *A:* Representative images of Western blotting for hCRP in the liver, kidney, and heart of 6-month-old WT rats and hCRP-Tg rats. *B:* Representative images of Western blotting for hCRP in the retina of 6-month-old WT rats and hCRP-Tg rats. *C:* hCRP levels in the serum of hCRP-Tg rats at the indicated ages. *D:* Blood glucose levels of age-matched WT rats and hCRP-Tg rats at indicated ages. *E:* Body weights of age-matched WT rats and hCRP-Tg rats at indicated ages. Data were presented as mean  $\pm$  SEM (n = 10-12). \*  $P < 0.05$ .

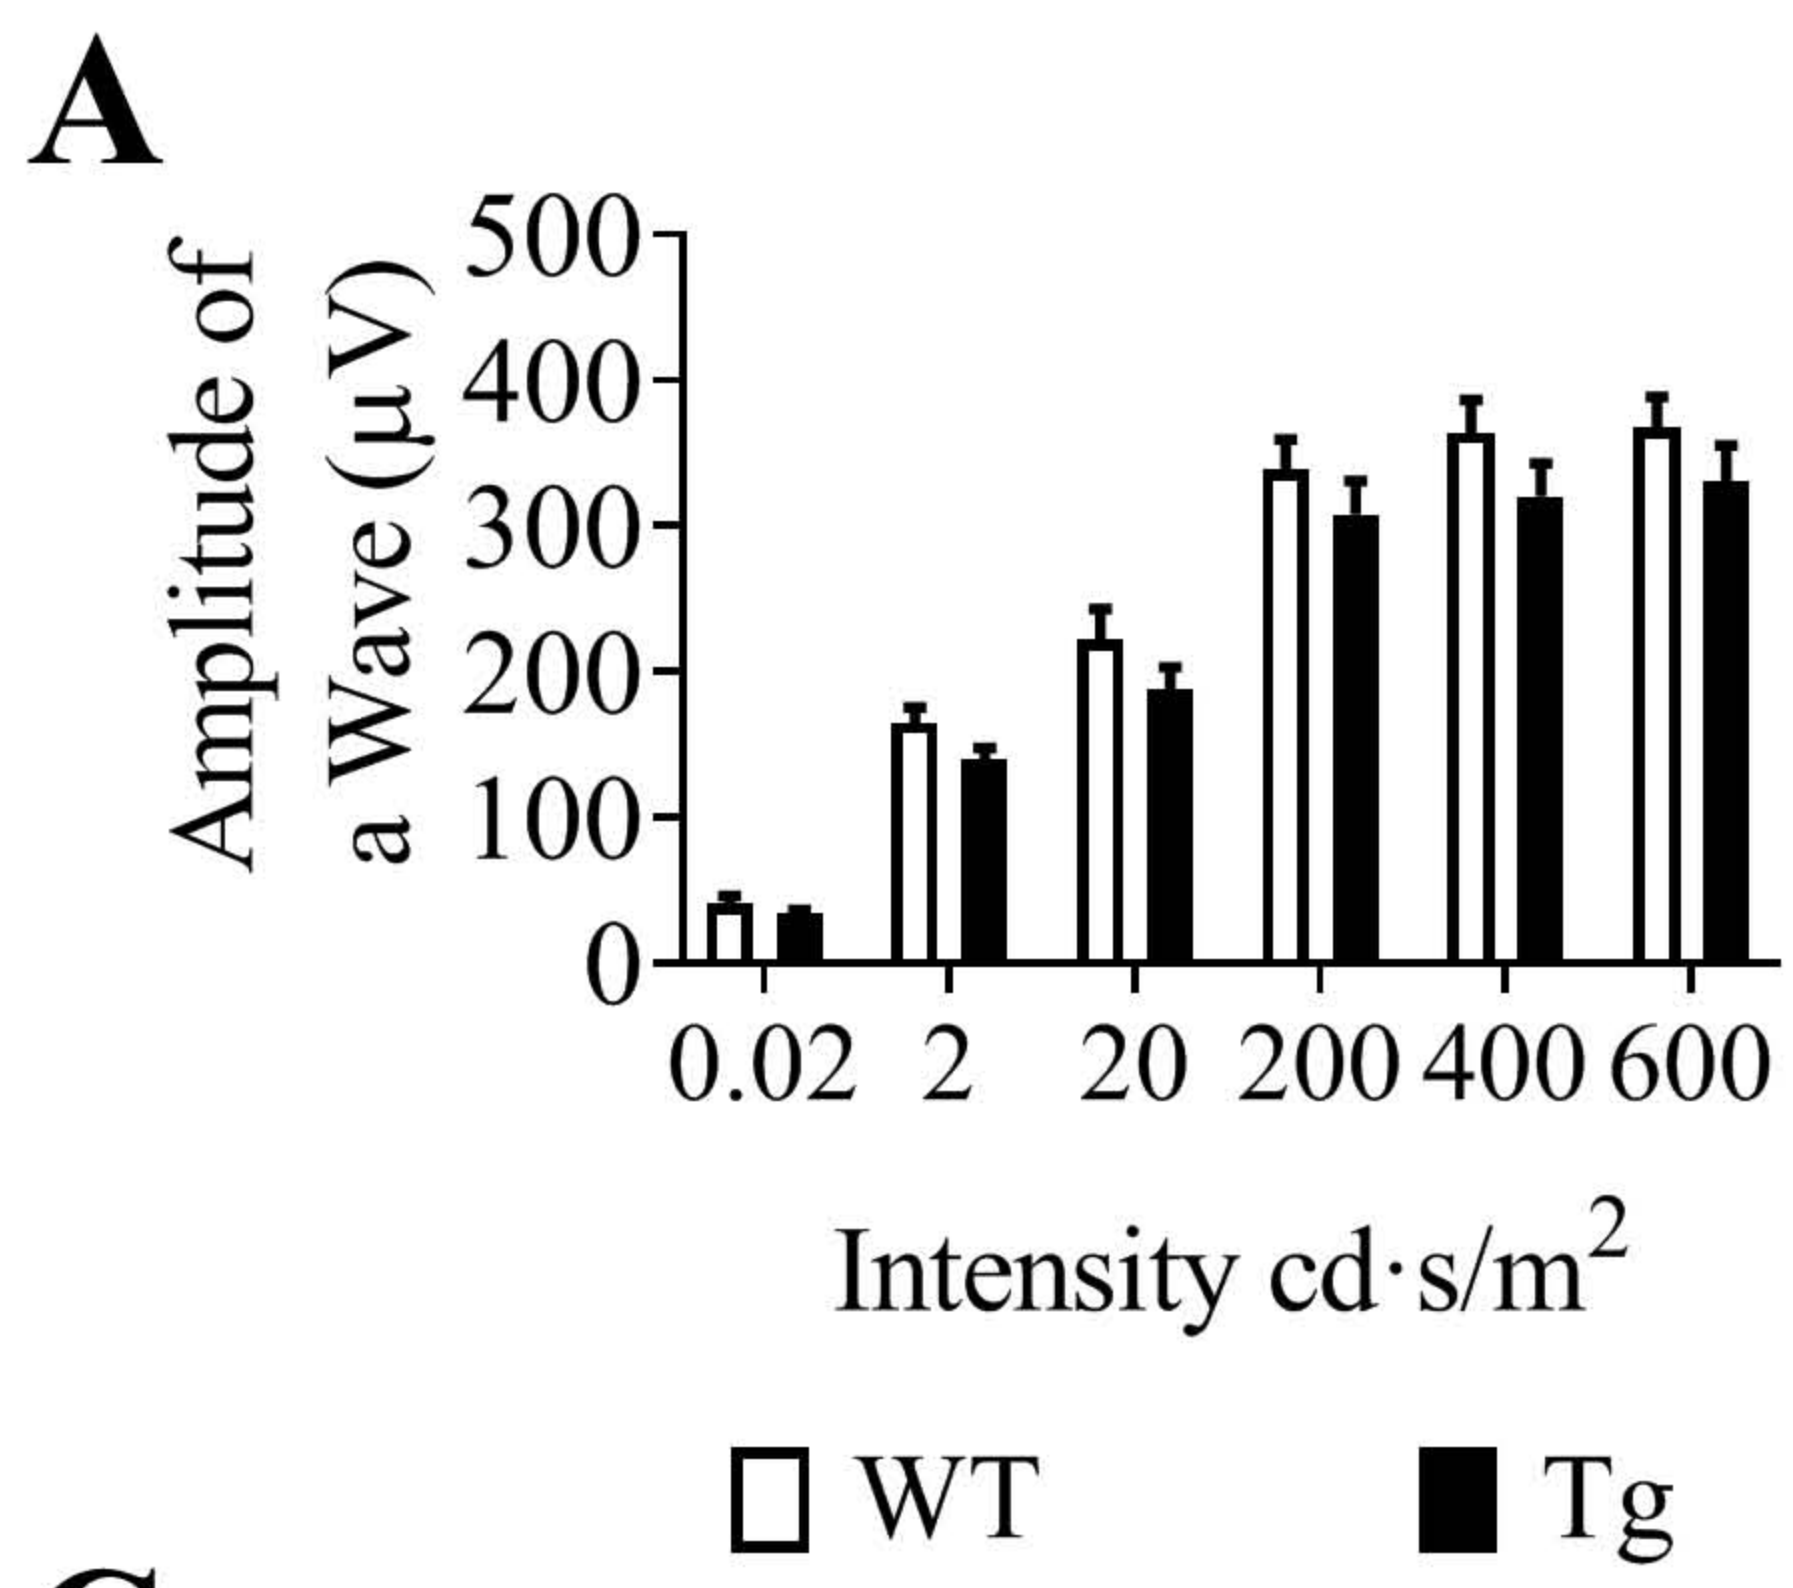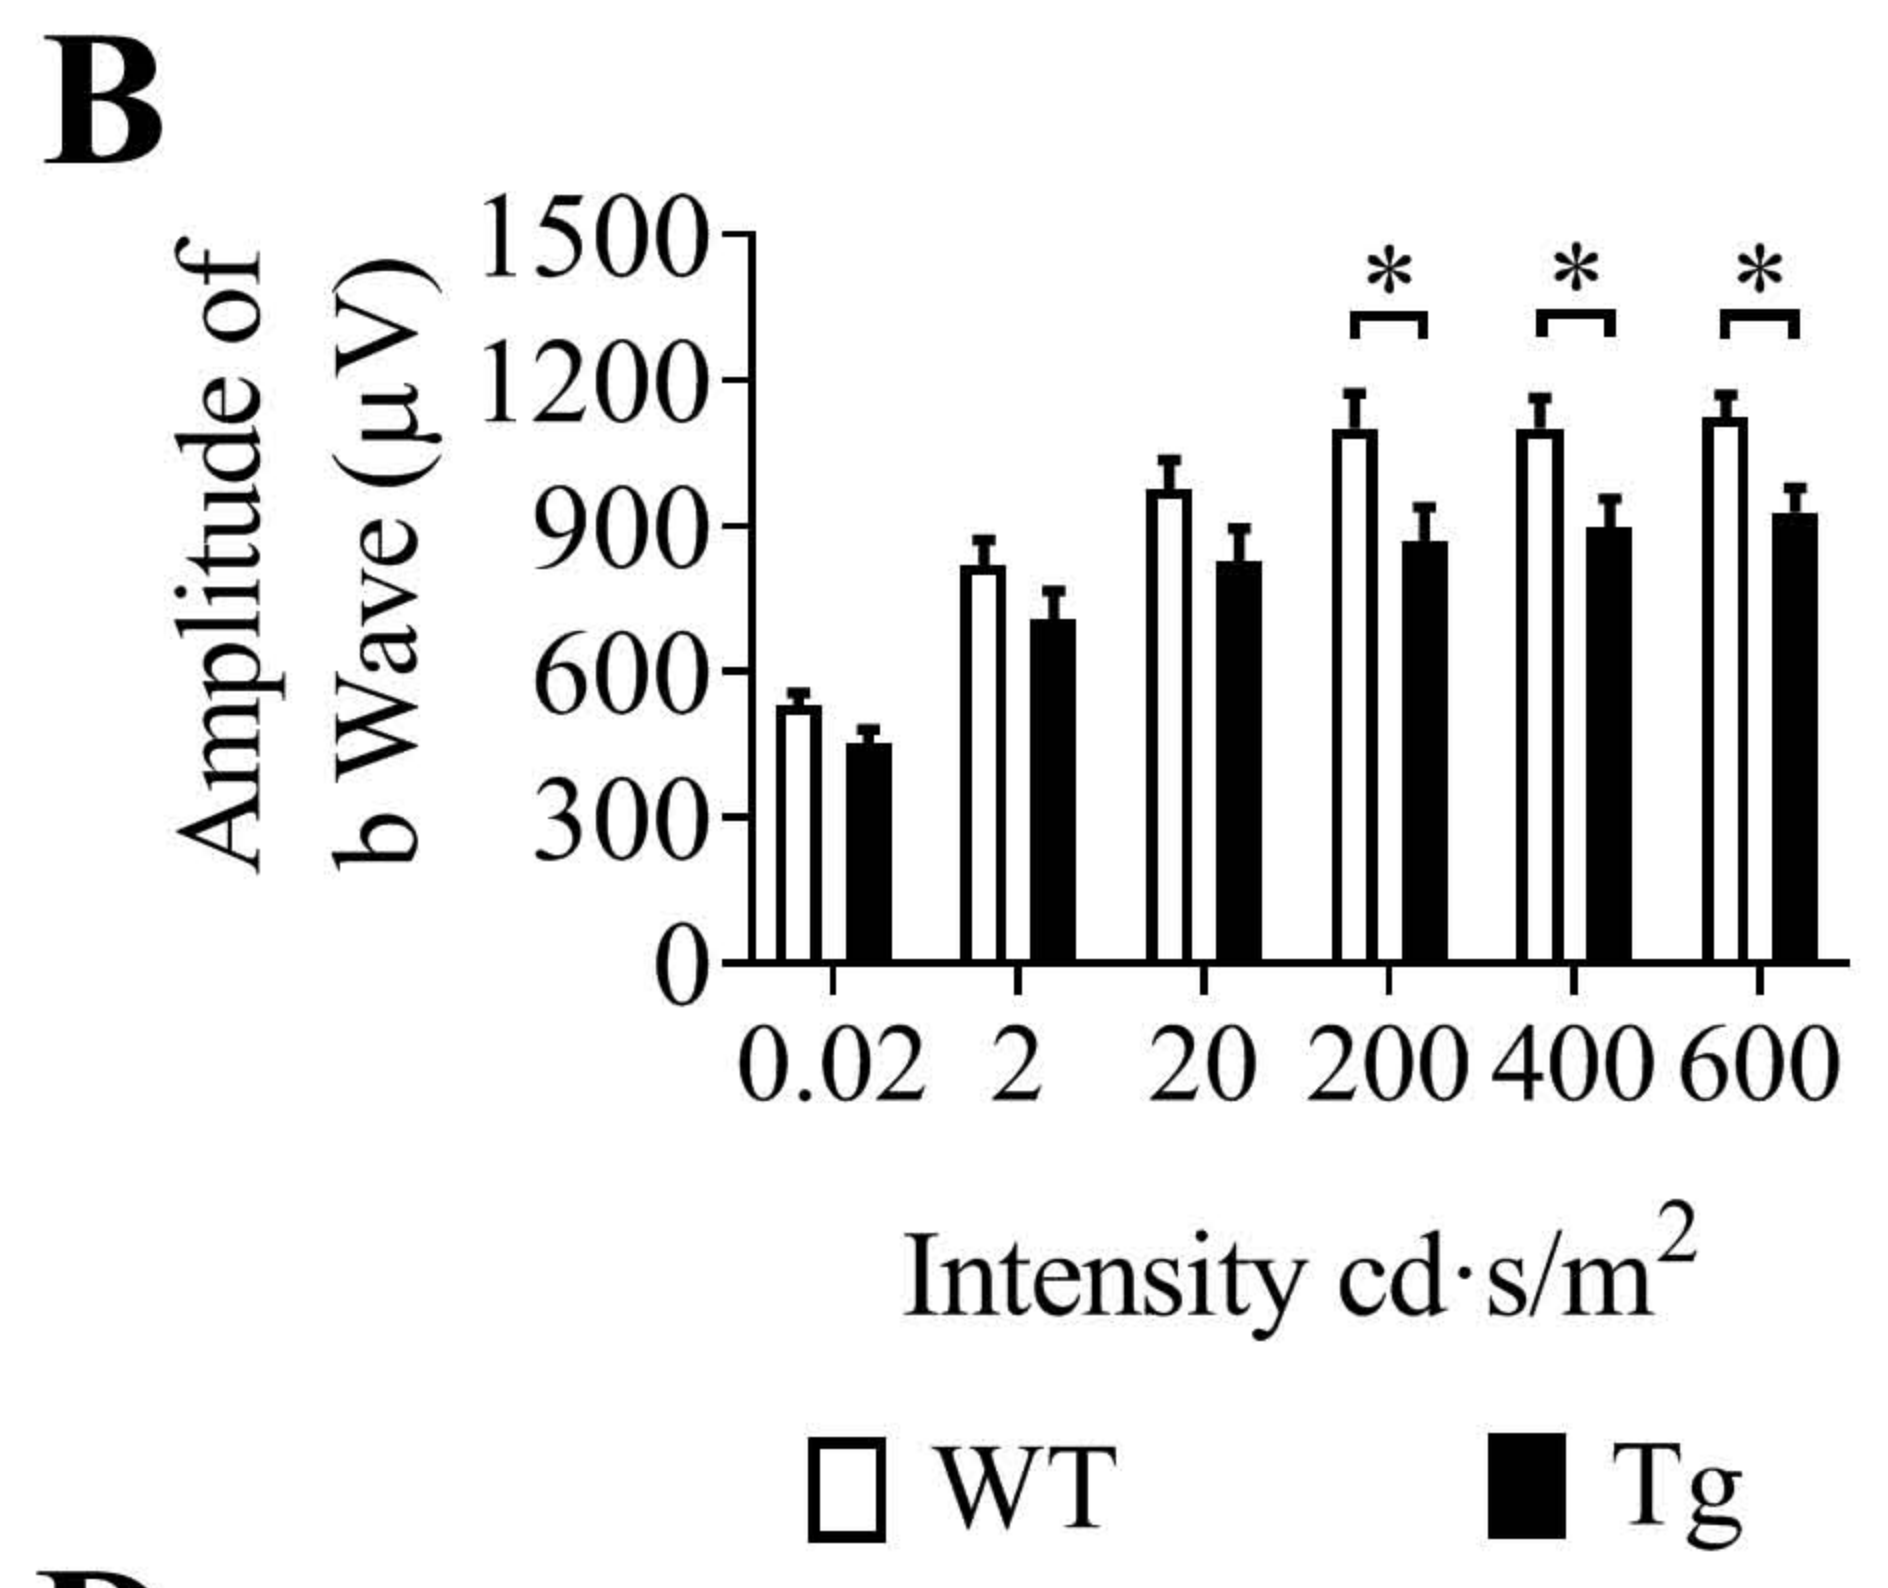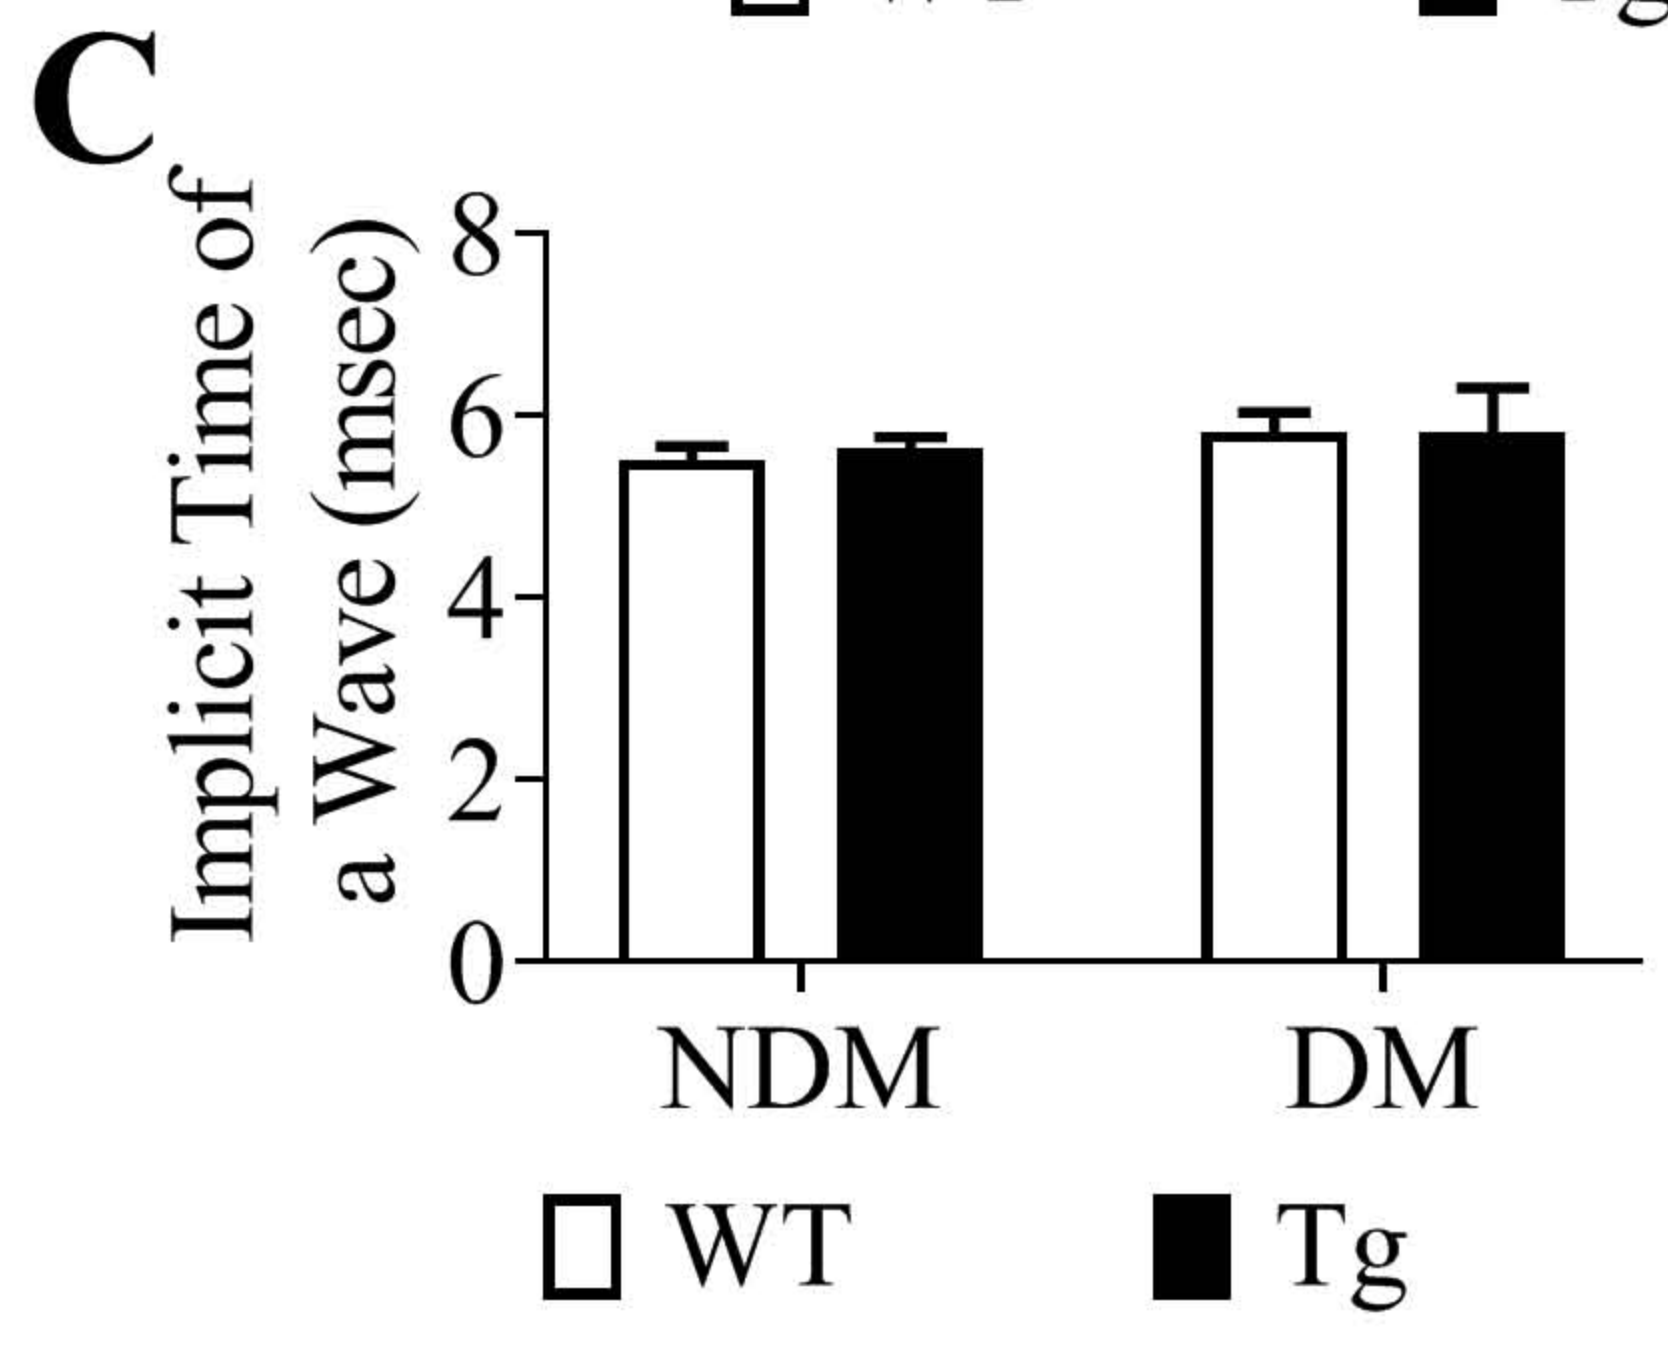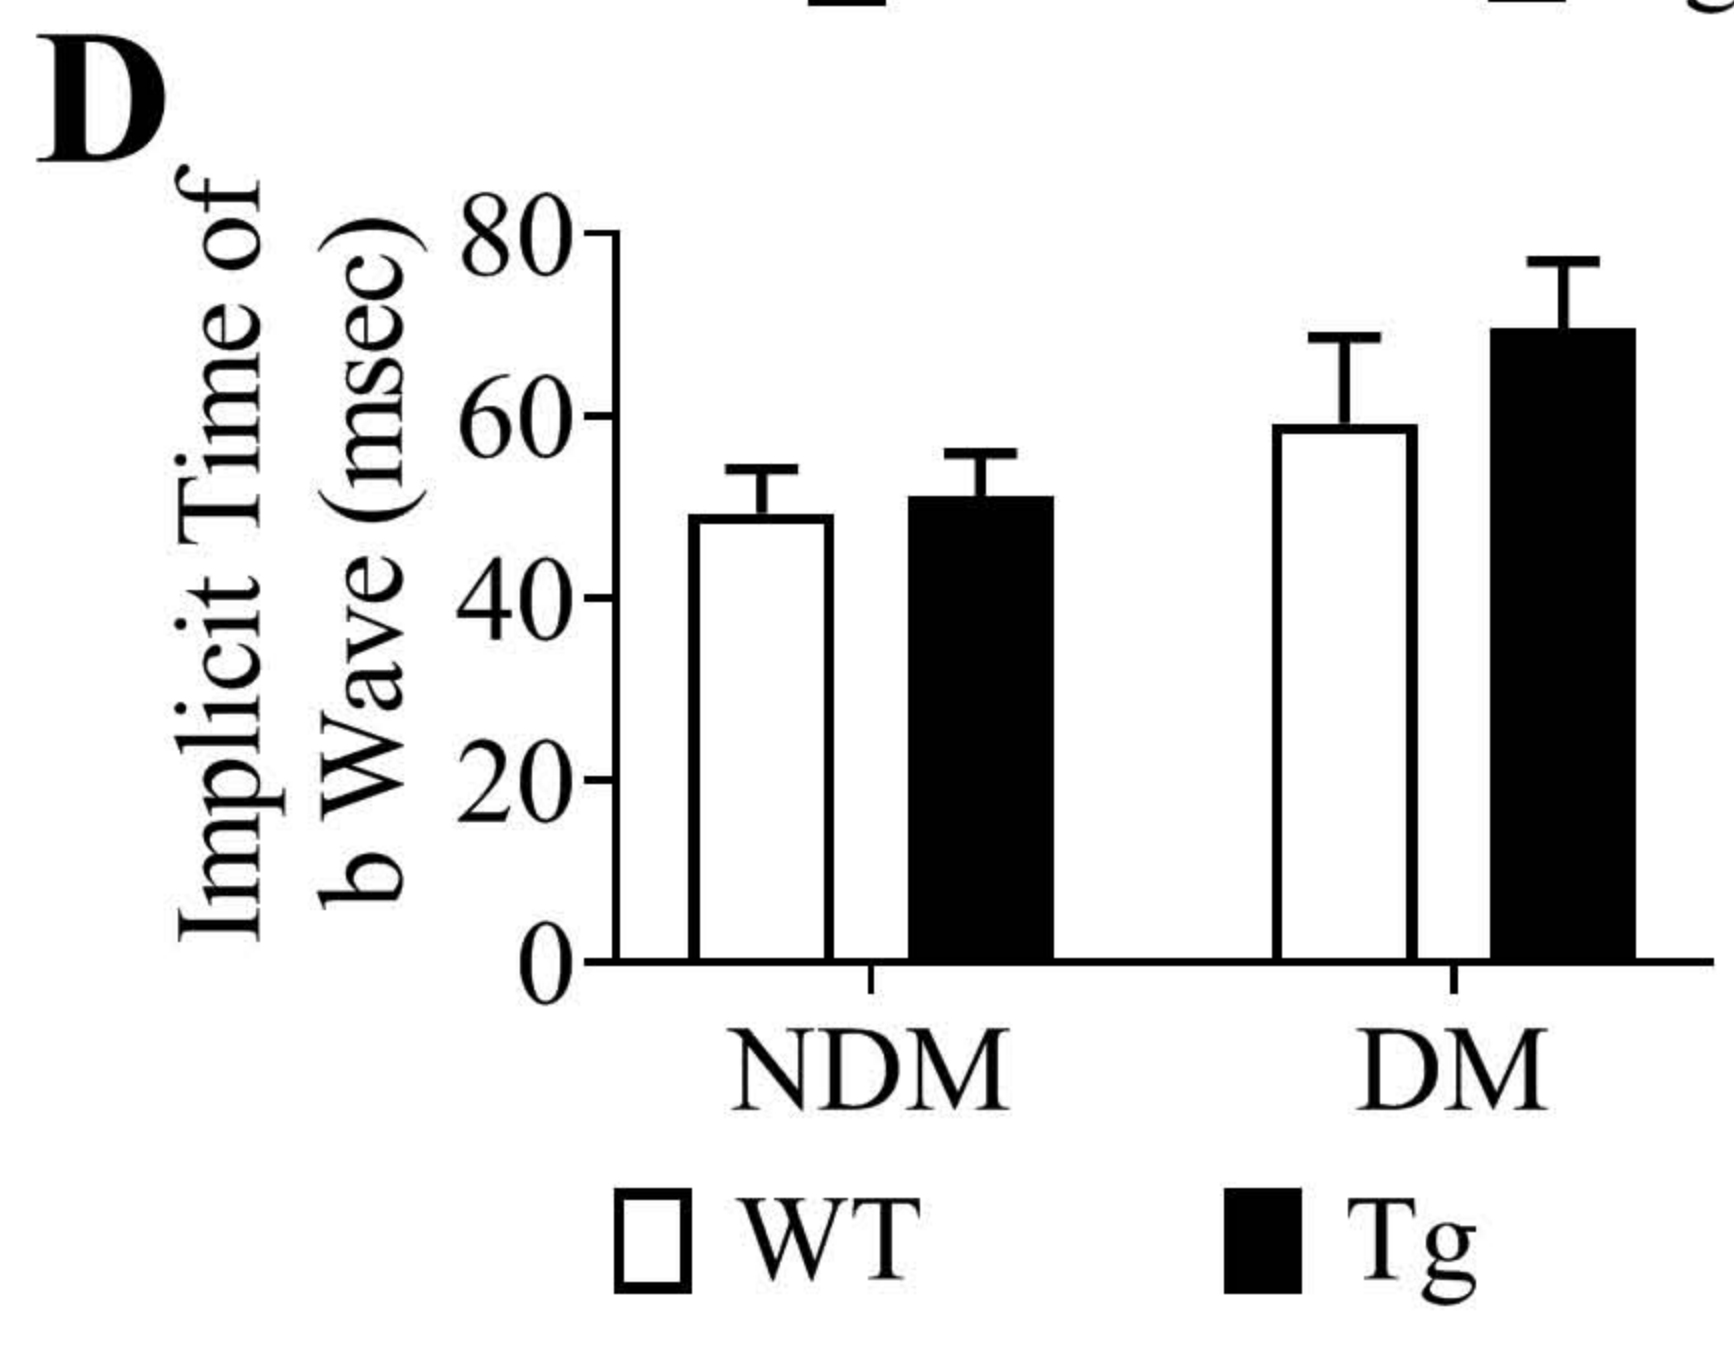

**Supplementary Figure 2. ERG amplitudes and implicit time of scotopic a-wave and b-wave.** *A* and *B*: Scotopic ERG a-wave (*A*) and b-wave (*B*) of 6-month-old WT and hCRP-Tg rats were measured in response to different intensities of light stimuli. *C*: The implicit time of scotopic a-wave of 6-month-old WT and hCRP-Tg rats (Tg) in the presence of diabetes (DM) or in the absence of diabetes (NDM). *D*: The implicit time of scotopic b-wave of 6-month-old WT and hCRP-Tg rats in the presence of diabetes or in the absence of diabetes. Data were presented as mean  $\pm$  SEM (n=6). \* P < 0.05.

**A**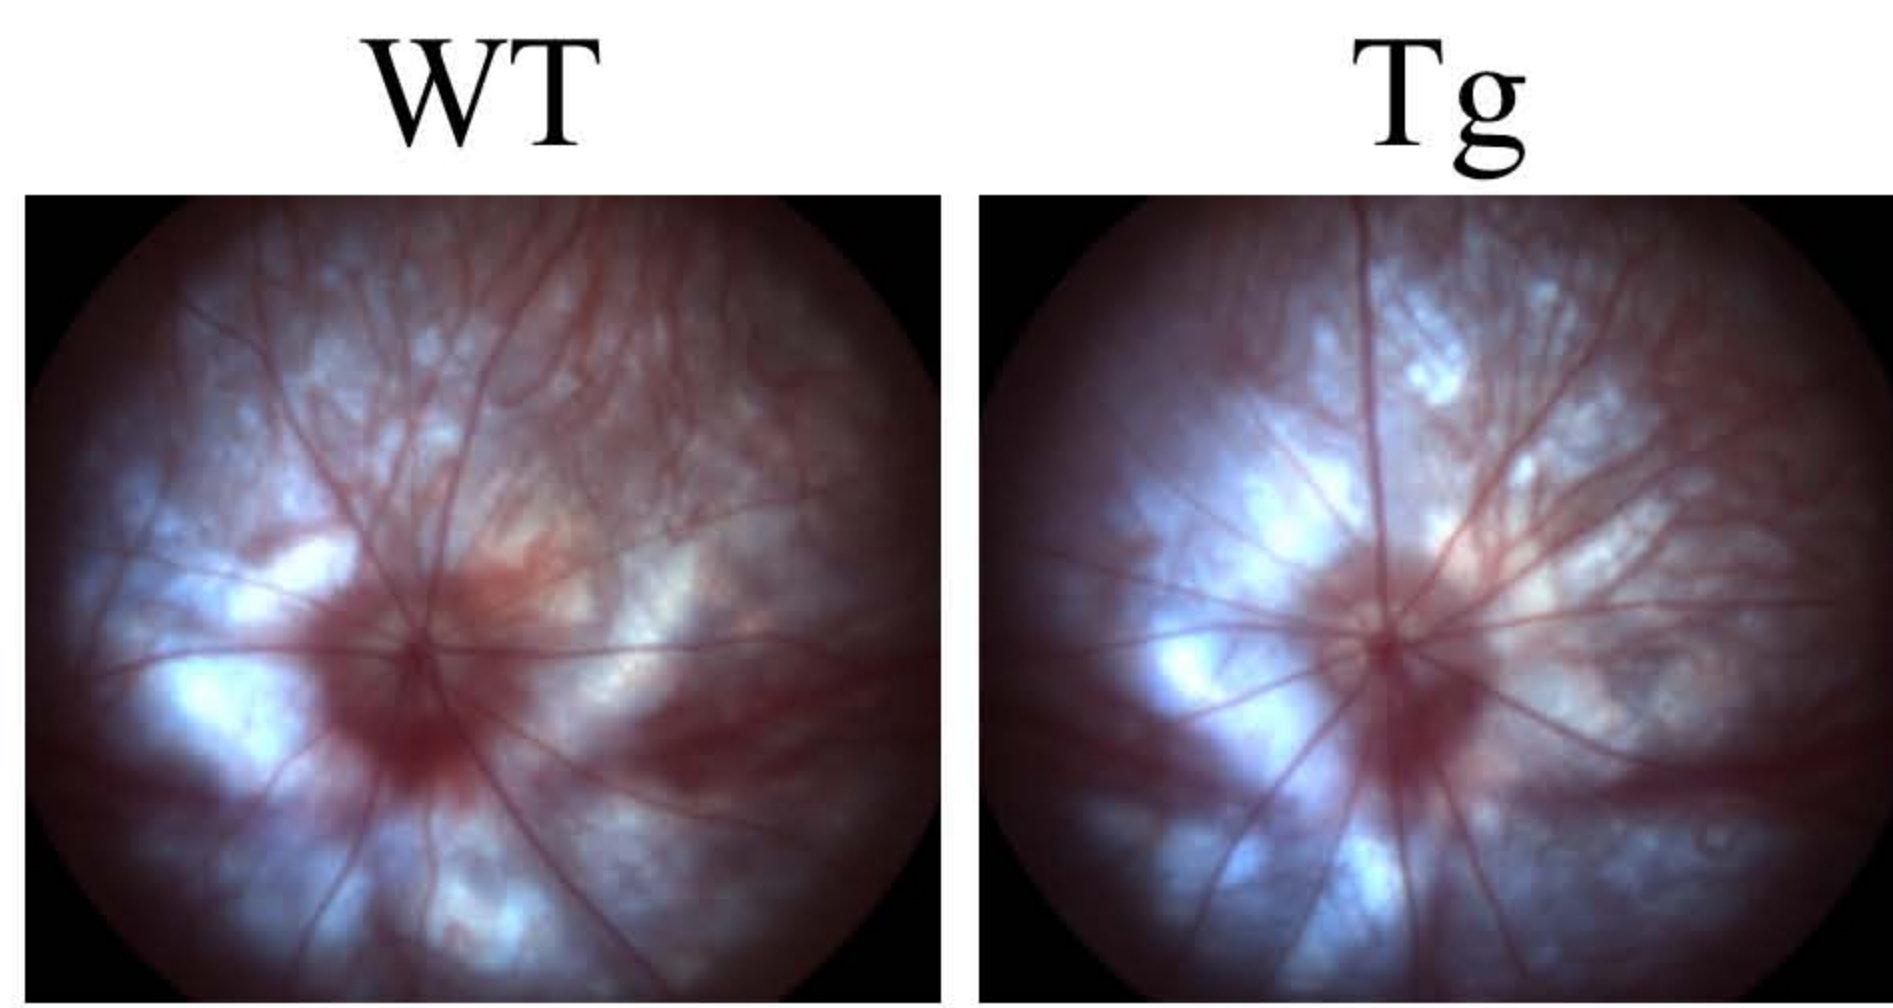**B**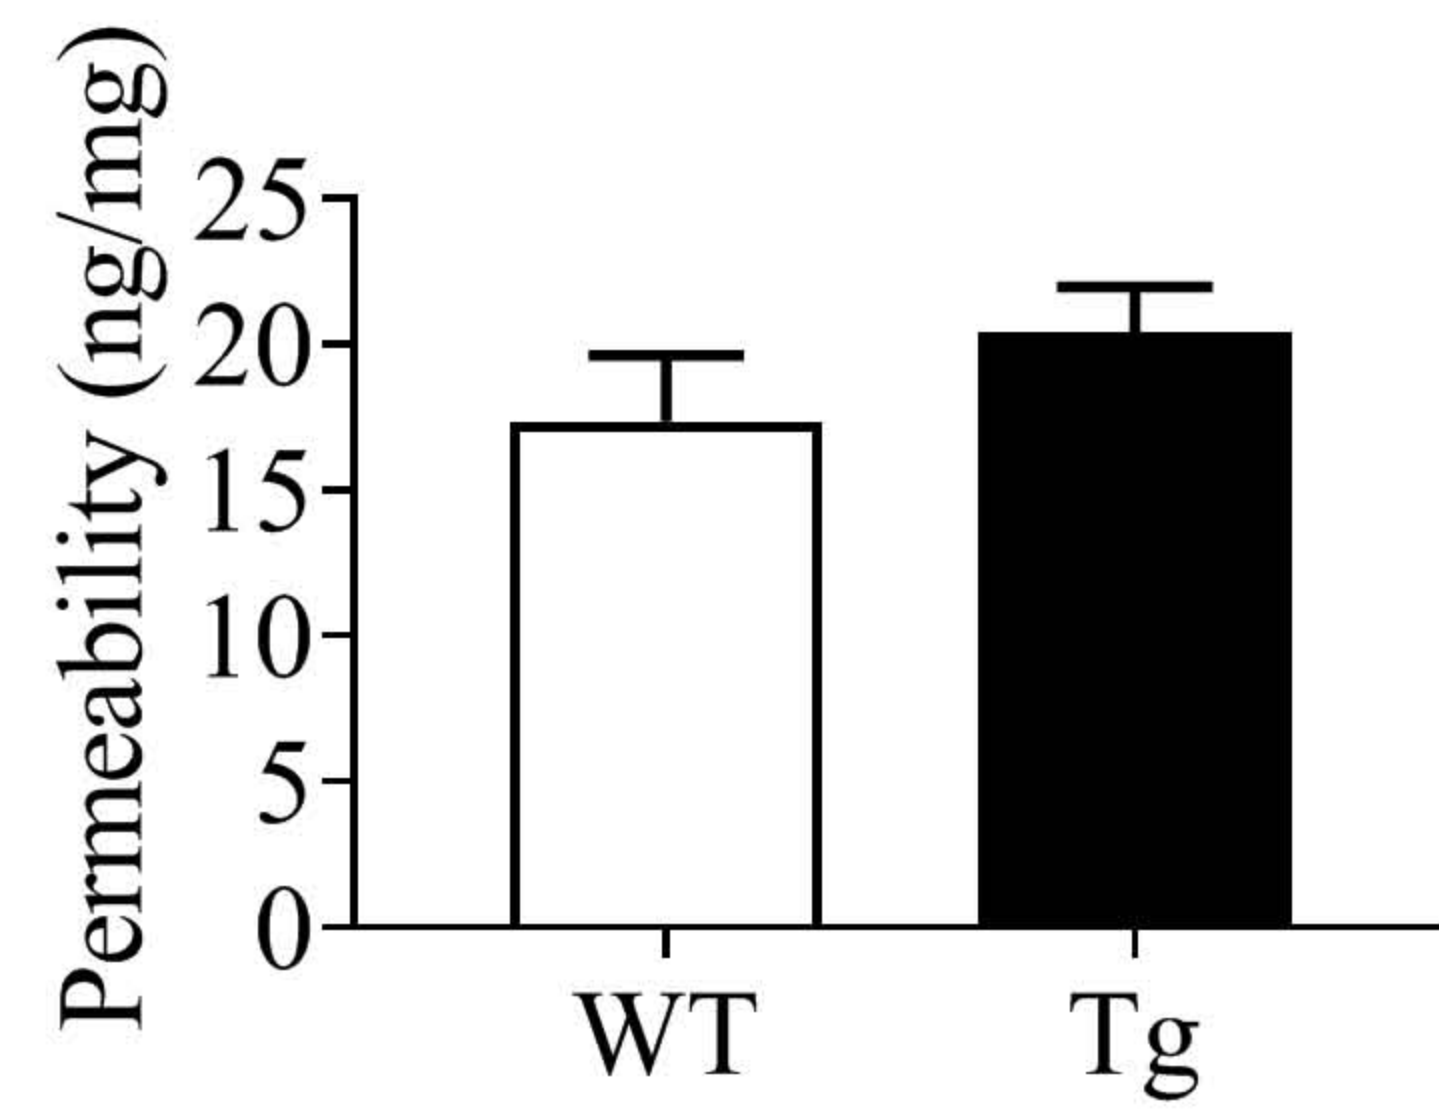**C**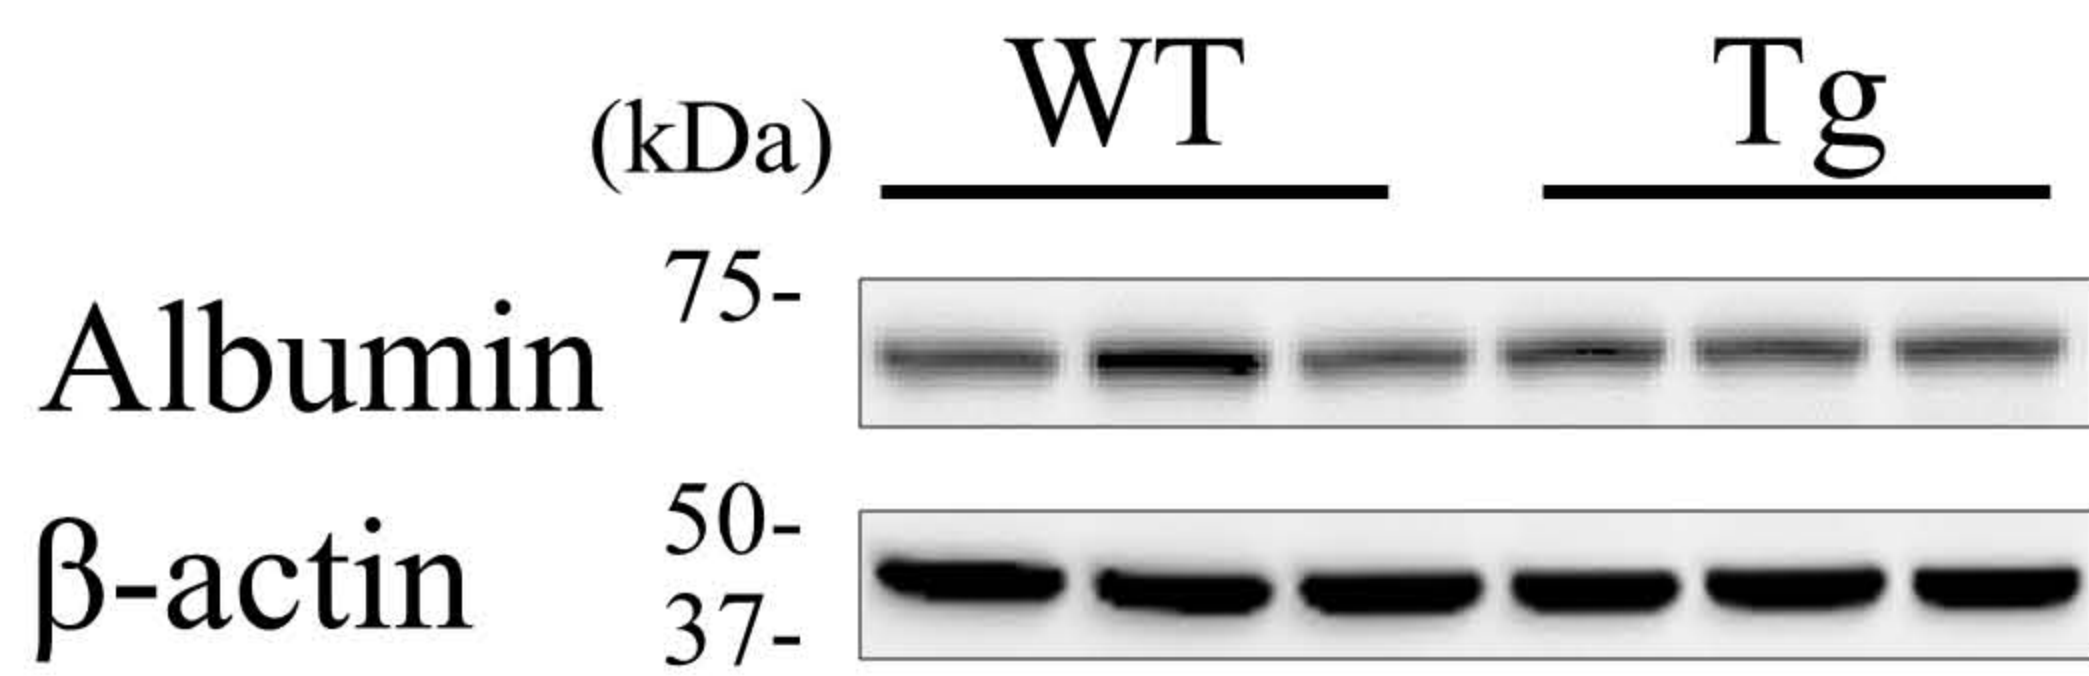**D**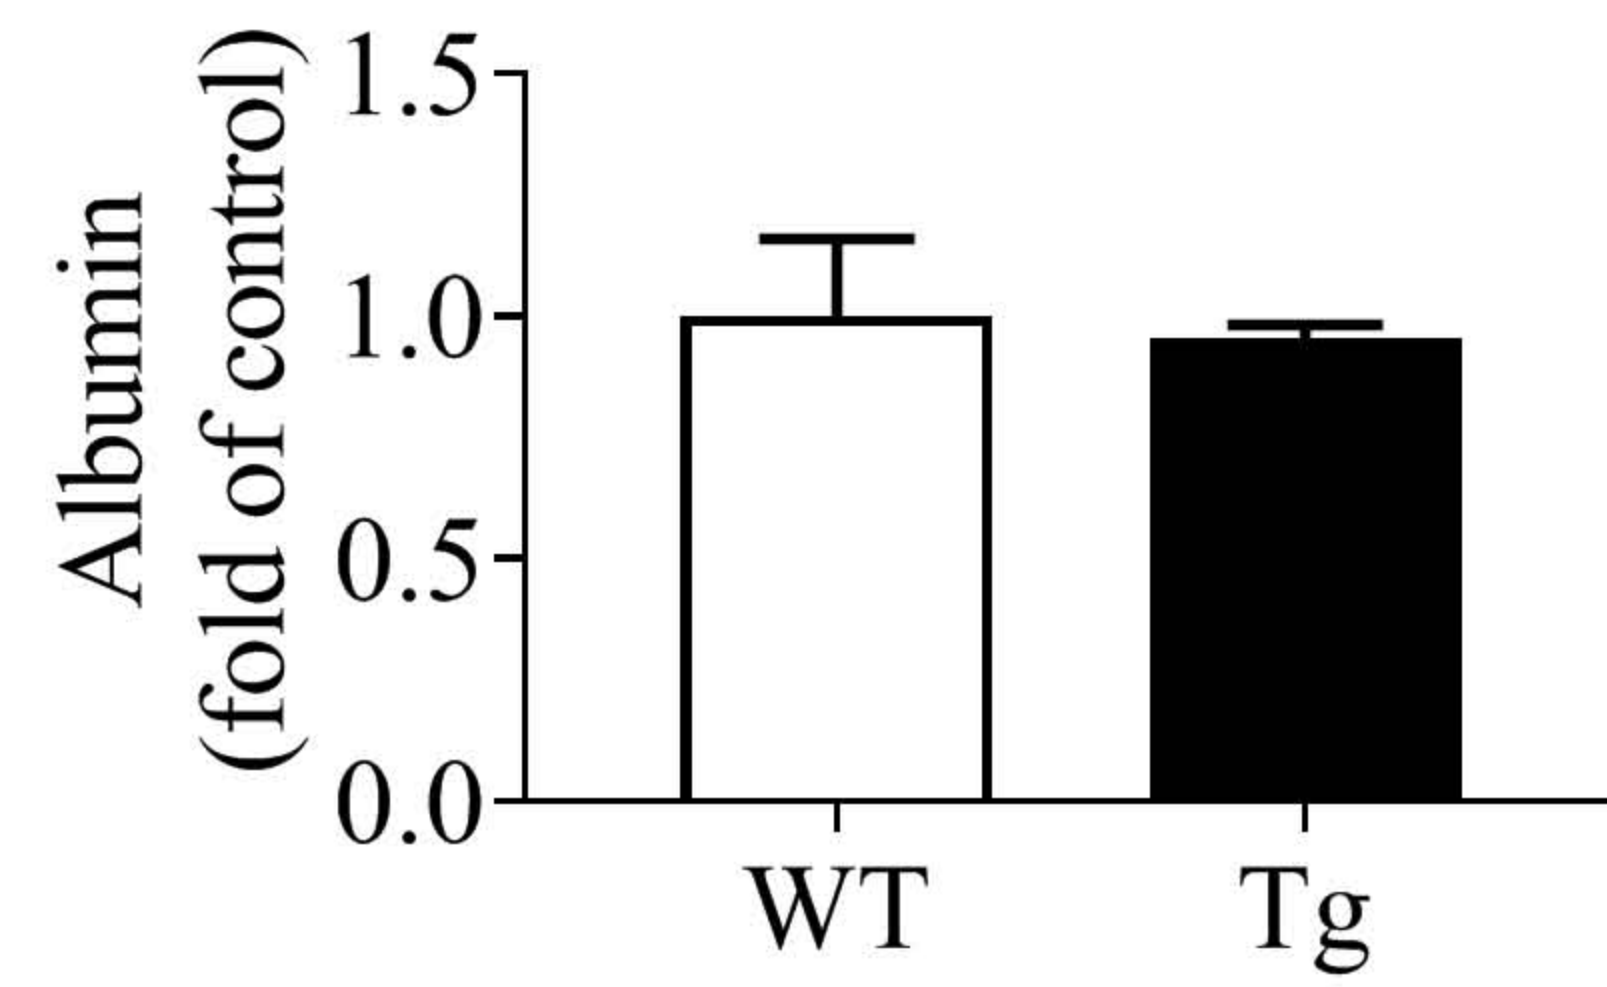**E**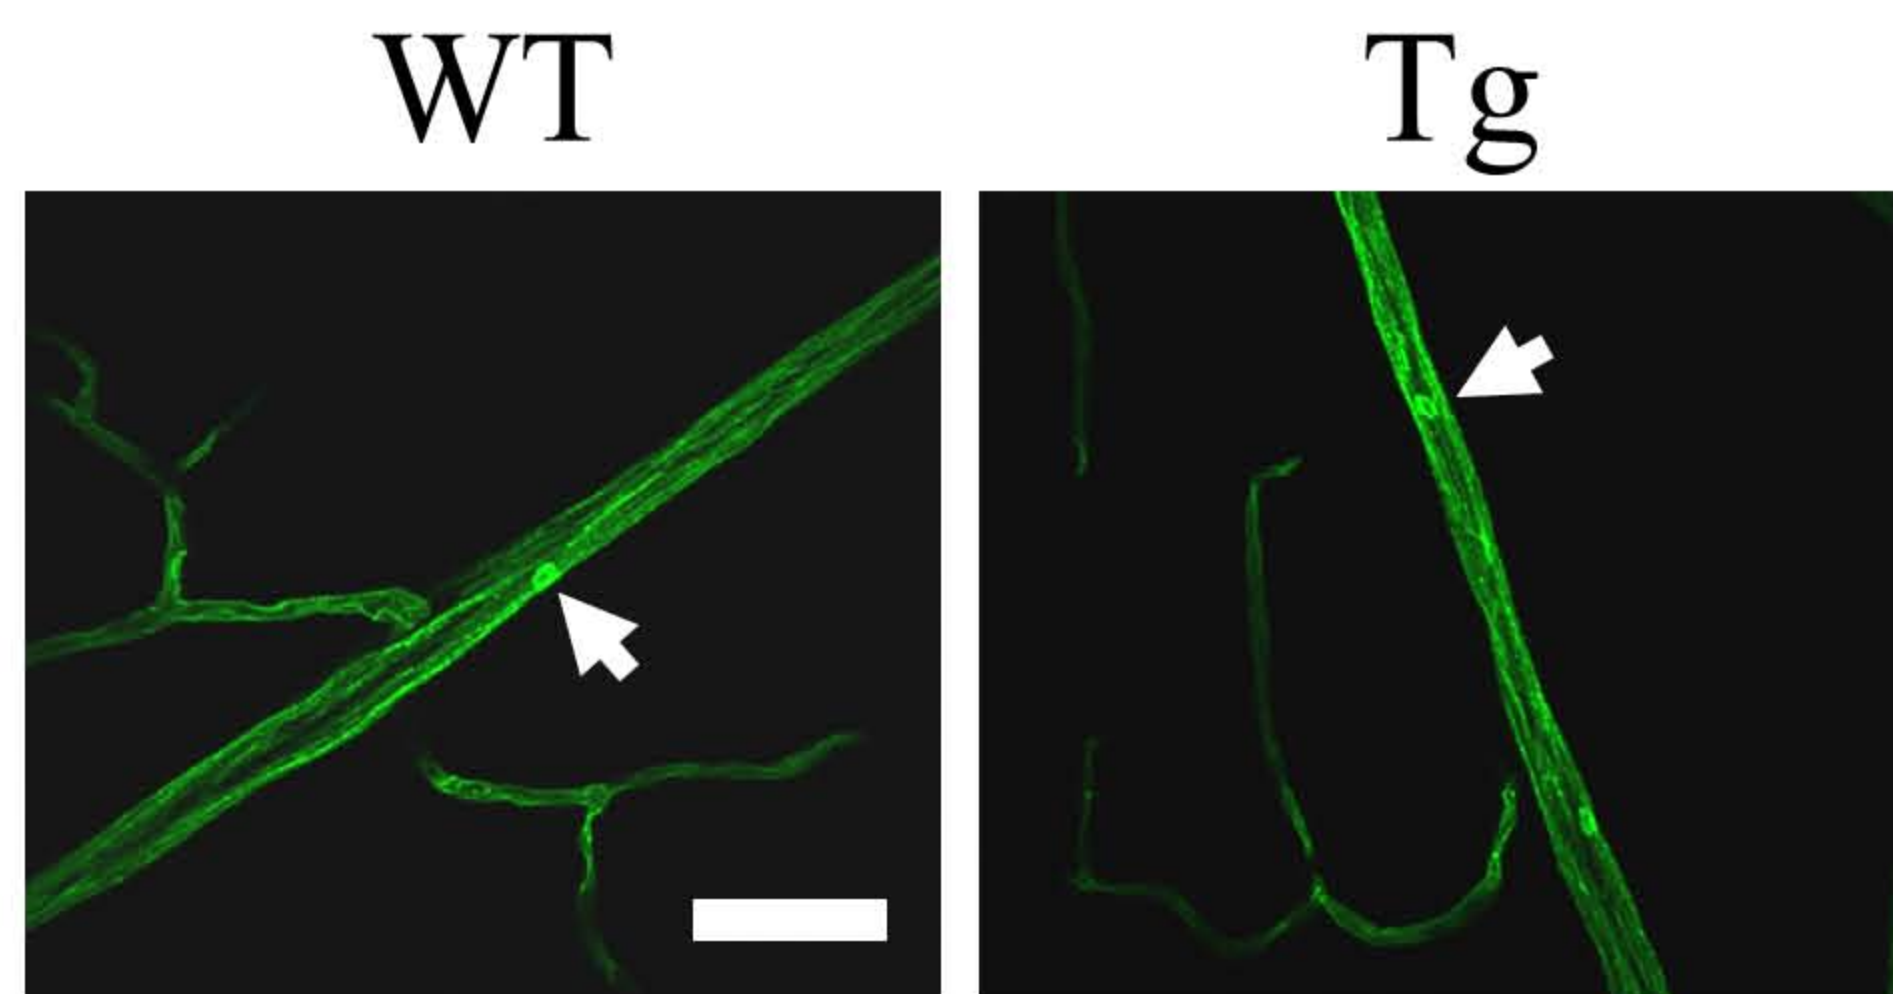**F**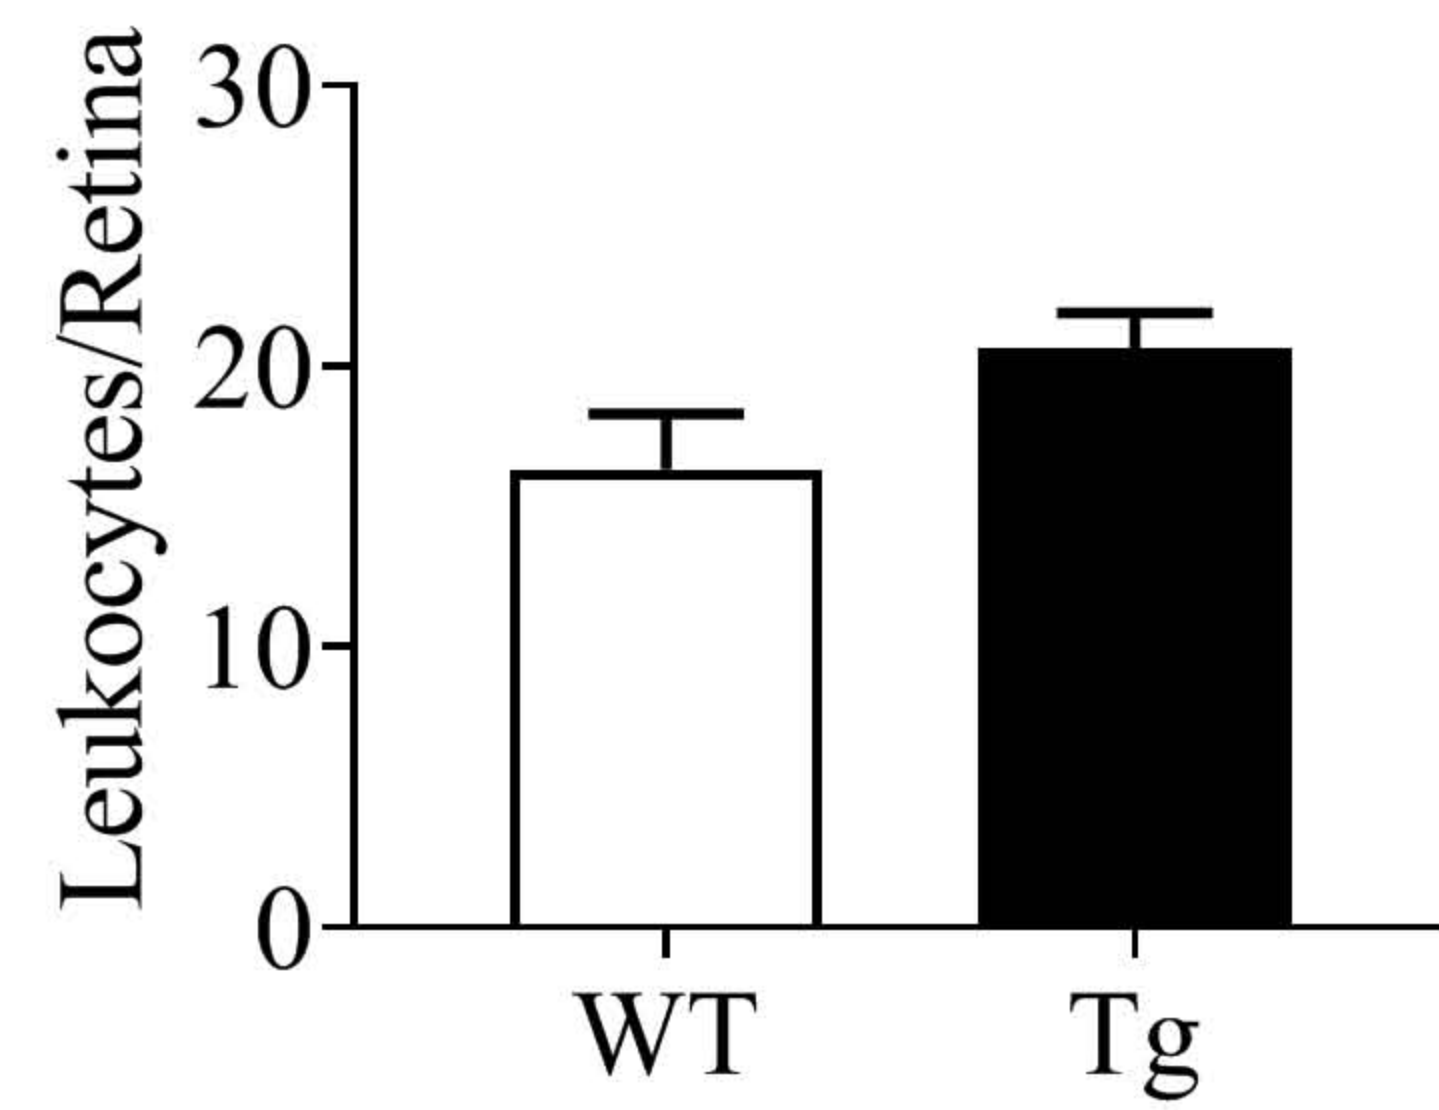

**Supplementary Figure 3. Elevated hCRP levels alone had no effect on retinal vasculature.** *A:* Bright field fundus imaging of 6-month-old WT rats and hCRP-Tg rats. *B:* Retinal vascular permeability assay in 6-month-old WT rats and hCRP-Tg rats. *C:* Representative images of Western blotting for albumin in the perfused retinas of 6-month-old WT rats and hCRP-Tg rats. *D:* Levels of albumin in the retina were quantified by densitometry. *E:* Representative images of leukostasis assay in 6-month-old WT rats and hCRP-Tg rats. White arrows indicated adherent leukocytes. Scale bar: 10  $\mu$ m. *F:* Adherent leukocytes were quantified. Data were presented as mean  $\pm$  SEM (n = 6).

**A**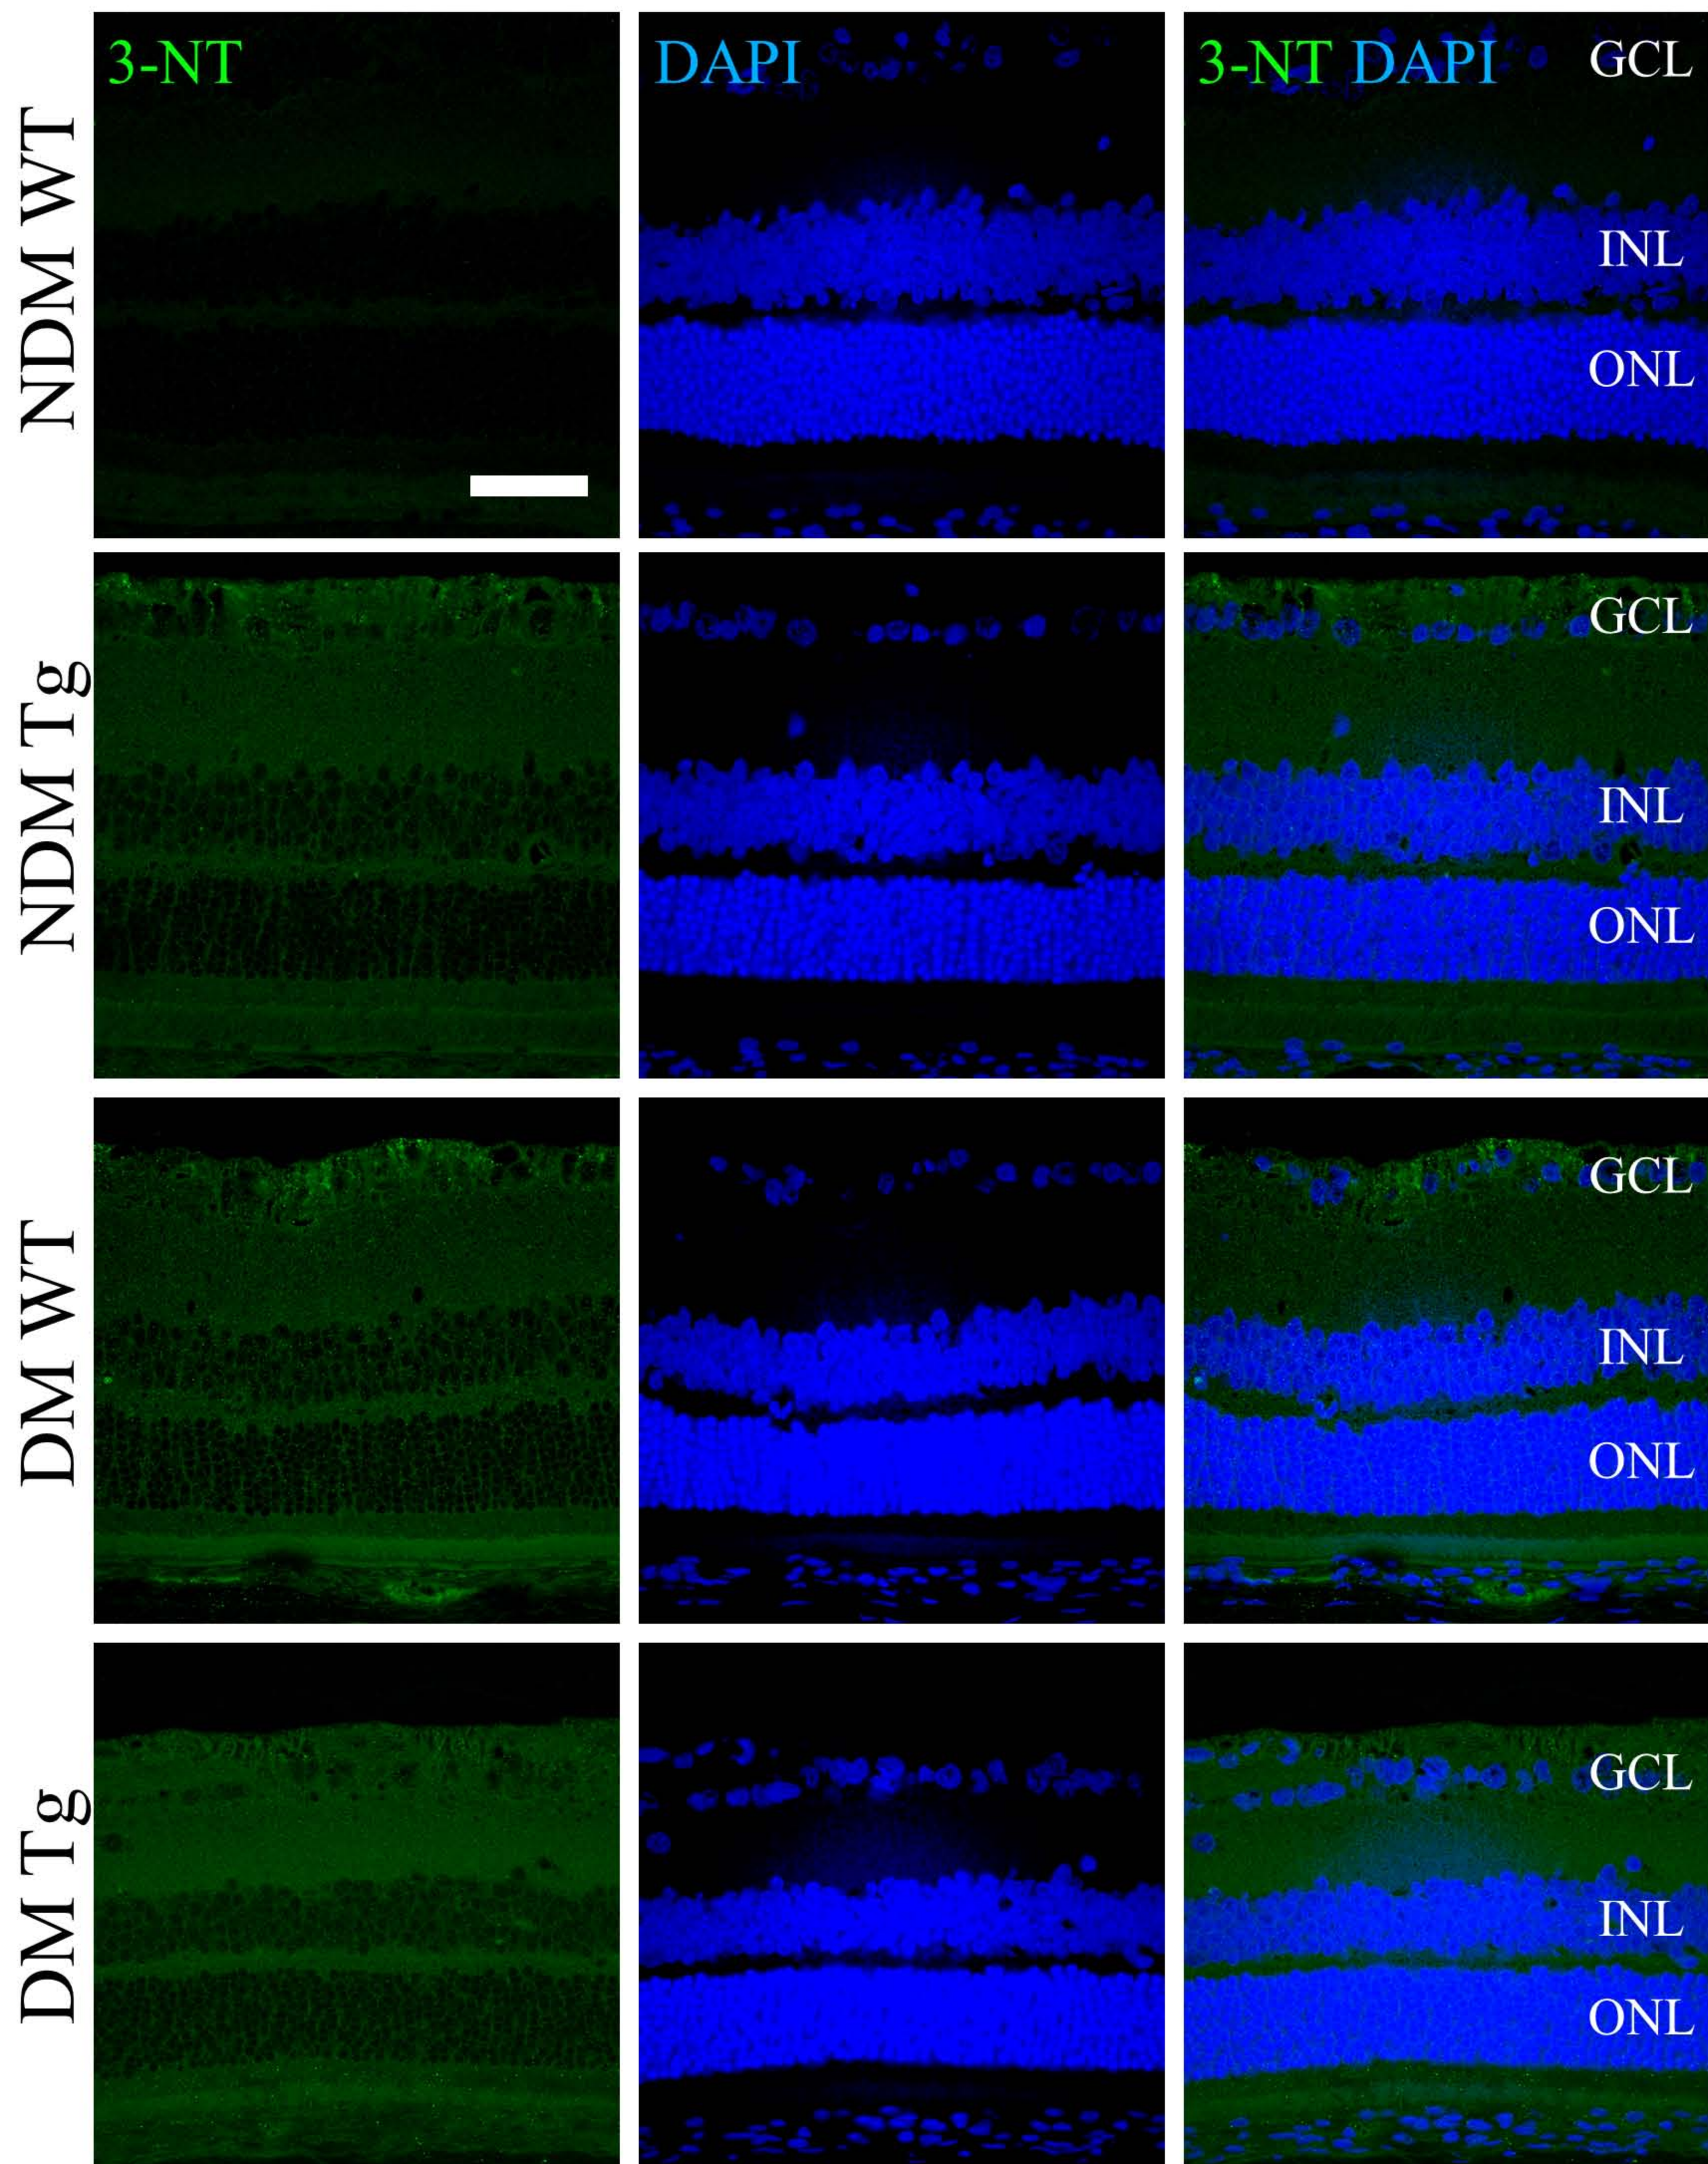**B**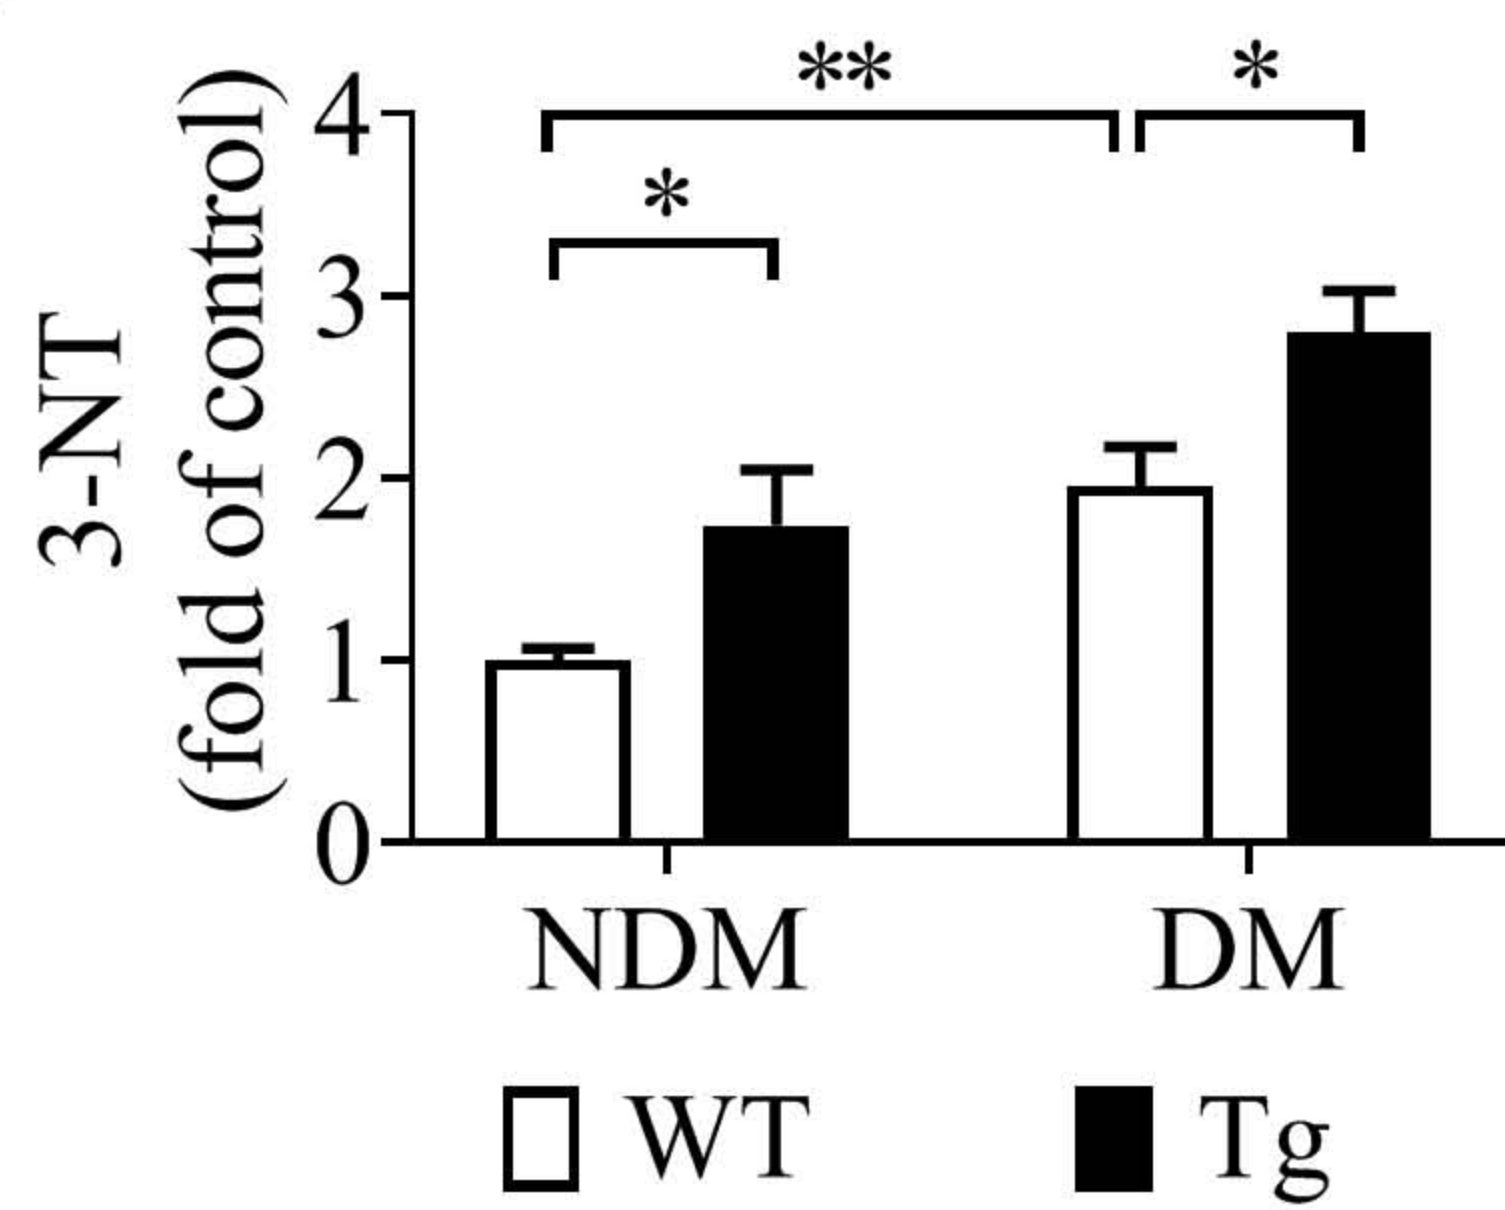

**Supplementary Figure 4. hCRP over-expression promoted diabetes-induced tyrosine nitration in retinal sections.** *A:* Representative images of 3-nitrotyrosine (3-NT) immunostaining in retinal sections of 6-month-old non-diabetic WT rats (NDM WT), non-diabetic hCRP-Tg rats (NDM Tg), diabetic WT rats (DM WT), and diabetic hCRP-Tg rats (DM Tg). *B:* Quantification of 3-NT intensity. Scale bar = 25  $\mu\text{m}$ . GCL: ganglion cell layer, INL: inner nuclear layer, ONL: outer nuclear layer. Data were presented as mean  $\pm$  SEM (n = 5-6). \*  $P < 0.05$ , \*\*  $P < 0.01$ .



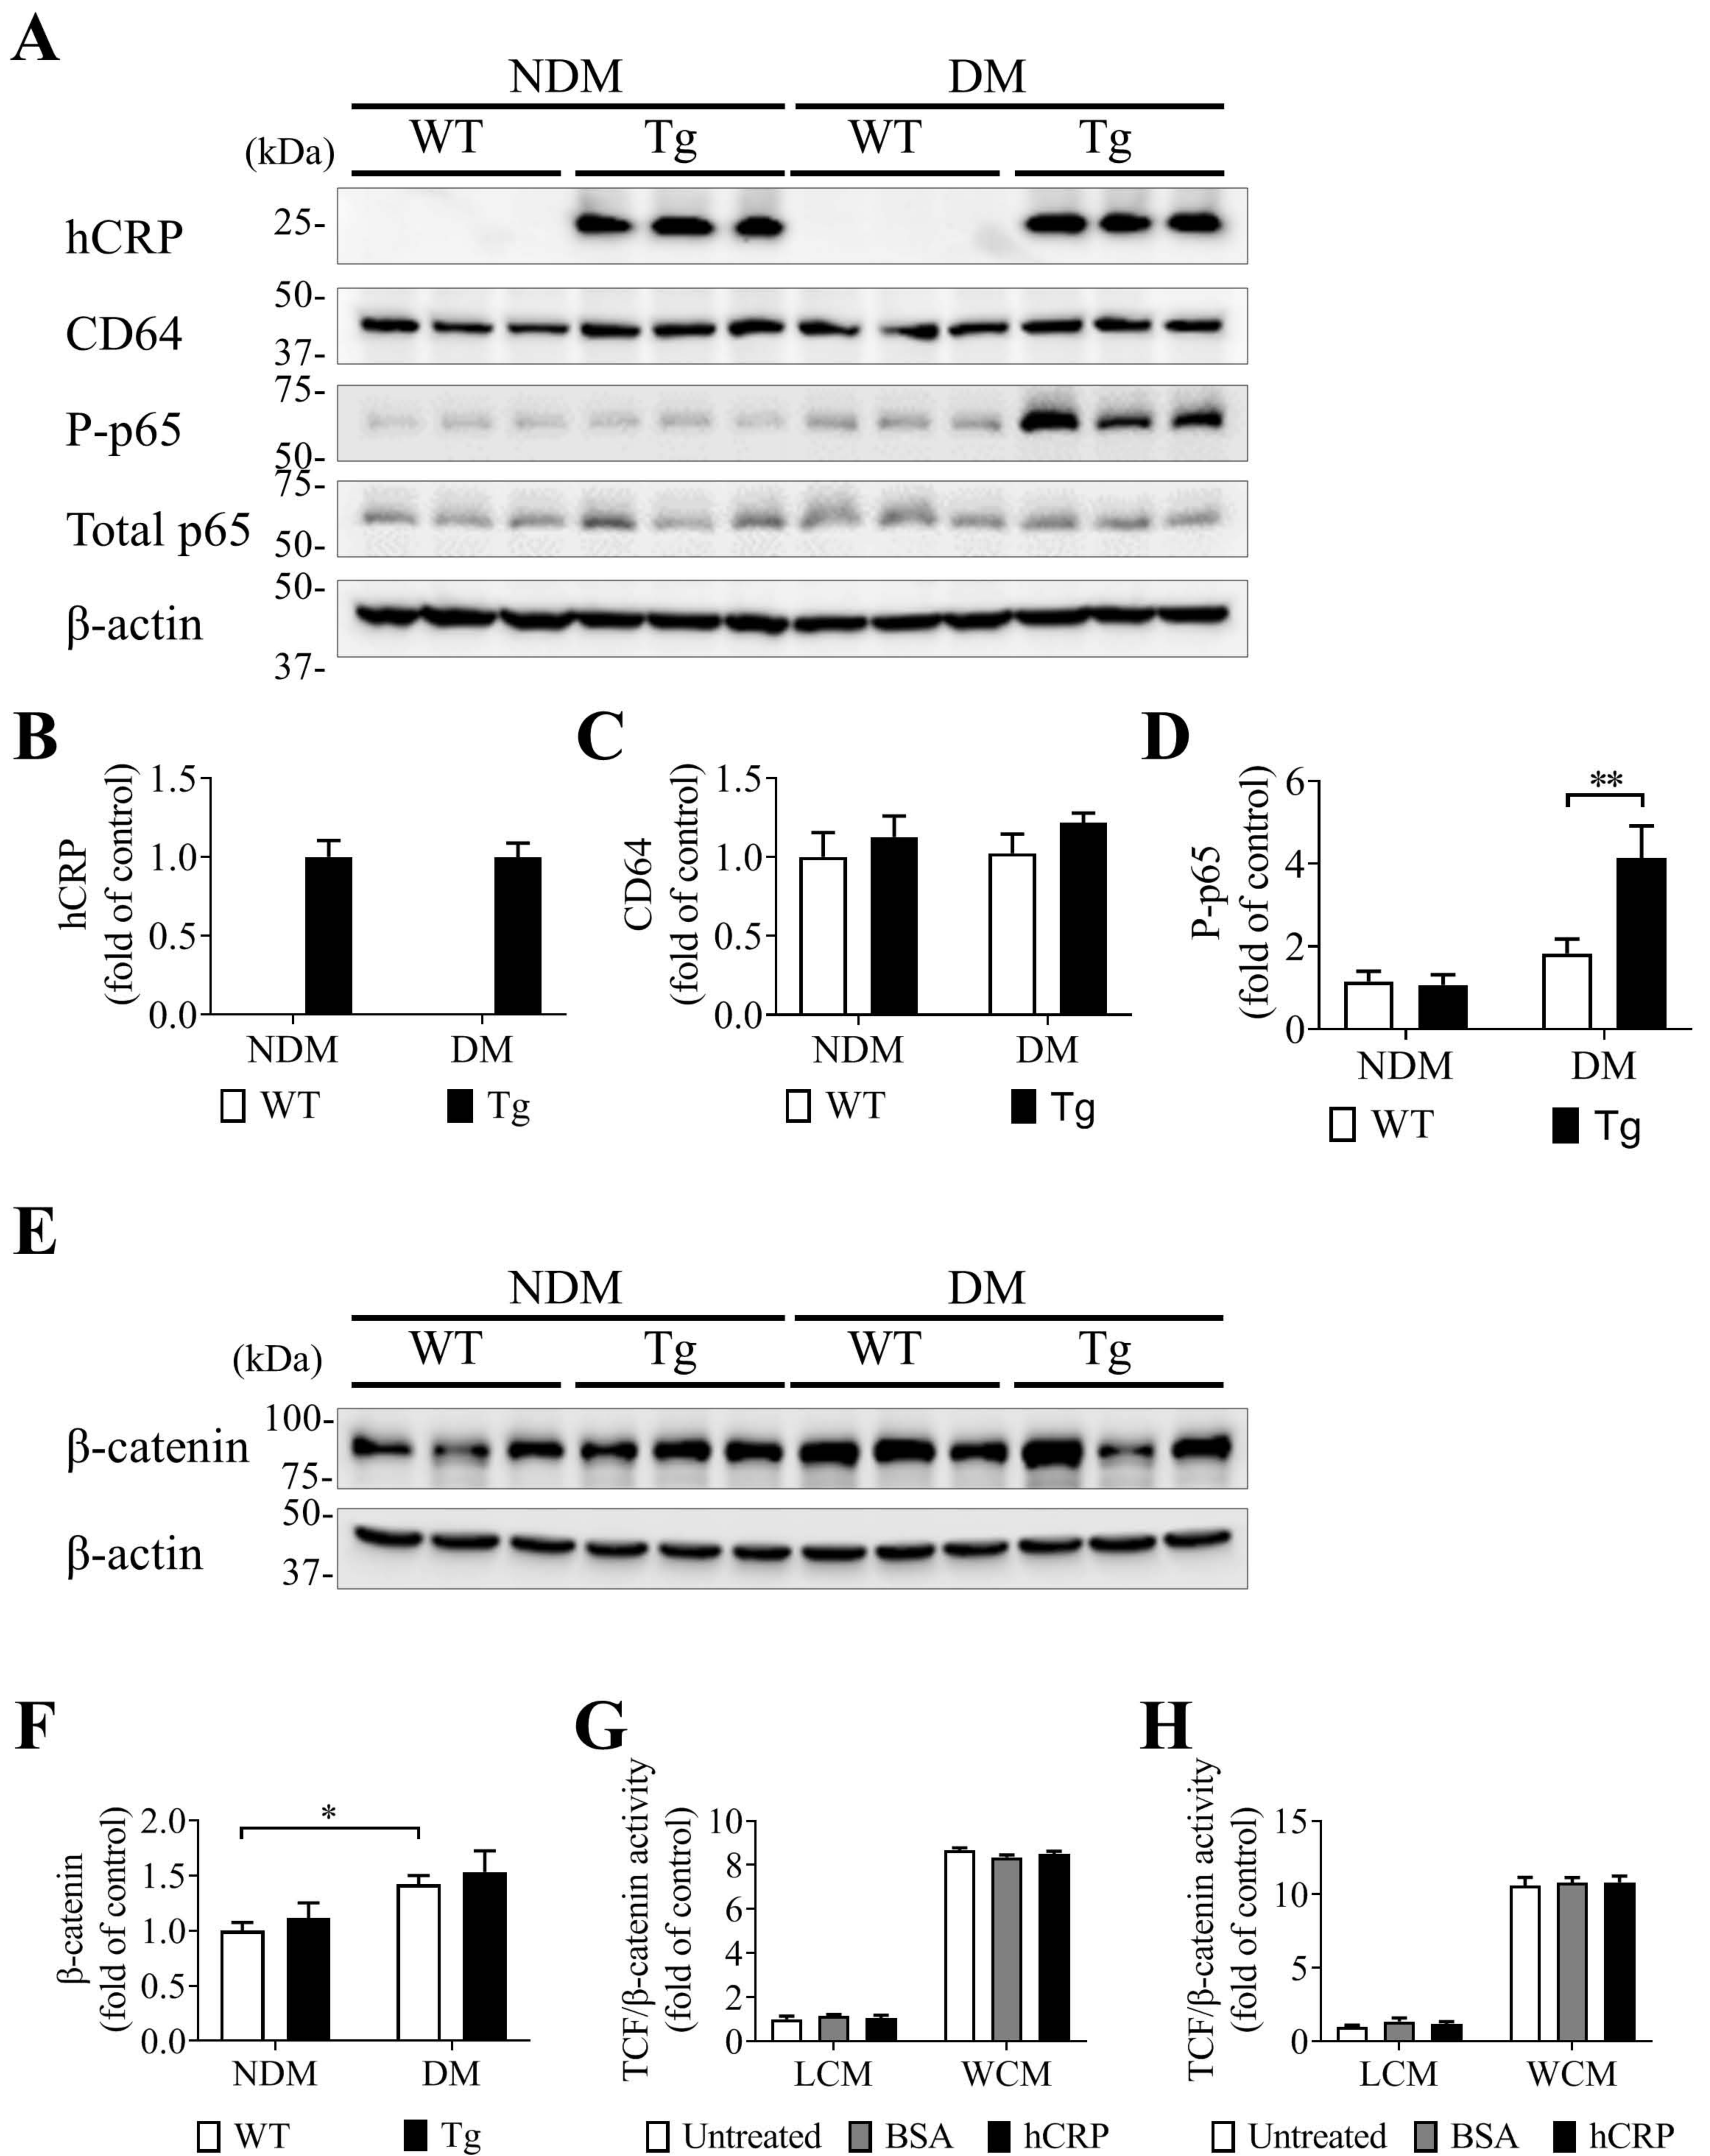

**Supplementary Figure 5. The effect of hCRP on NF- $\kappa$ B signaling and Wnt pathway.** *A*: Representative images of Western blotting for hCRP, CD64, phosphorylated p65 (P-p65) and total p65 in the retinas of 6-month-old diabetic WT rats and hCRP-Tg rats. *B-D*: Levels of hCRP (*B*), CD64 (*C*), and P-p65 (*D*) in *A* were quantified by densitometry. P-p65 were quantified and normalized to total p65. *E*: Representative images of Western blotting for  $\beta$ -catenin in the retinas of 6-month-old WT and hCRP-Tg rats in the presence or absence of STZ-induced diabetes. *F*: Levels of  $\beta$ -catenin in *A* were quantified by densitometry. *G* and *H*: The effect of hCRP on Wnt signaling was investigated in rMC-1 cells (*G*) and ARPE-19 cells (*H*). The cells were transiently transfected with TOPFLASH and pRL-TK plasmids. Then, the cells were treated with hCRP (10  $\mu$ g/ml) were cultured for 16 hr in the presence of 20% L conditioned medium or Wnt3A conditioned medium. The untreated cells and BSA-treated cells were used as controls. Then, the cells were harvested for luciferase assays. Data were presented as mean  $\pm$  SEM (n = 6). \*\* P < 0.01.

A

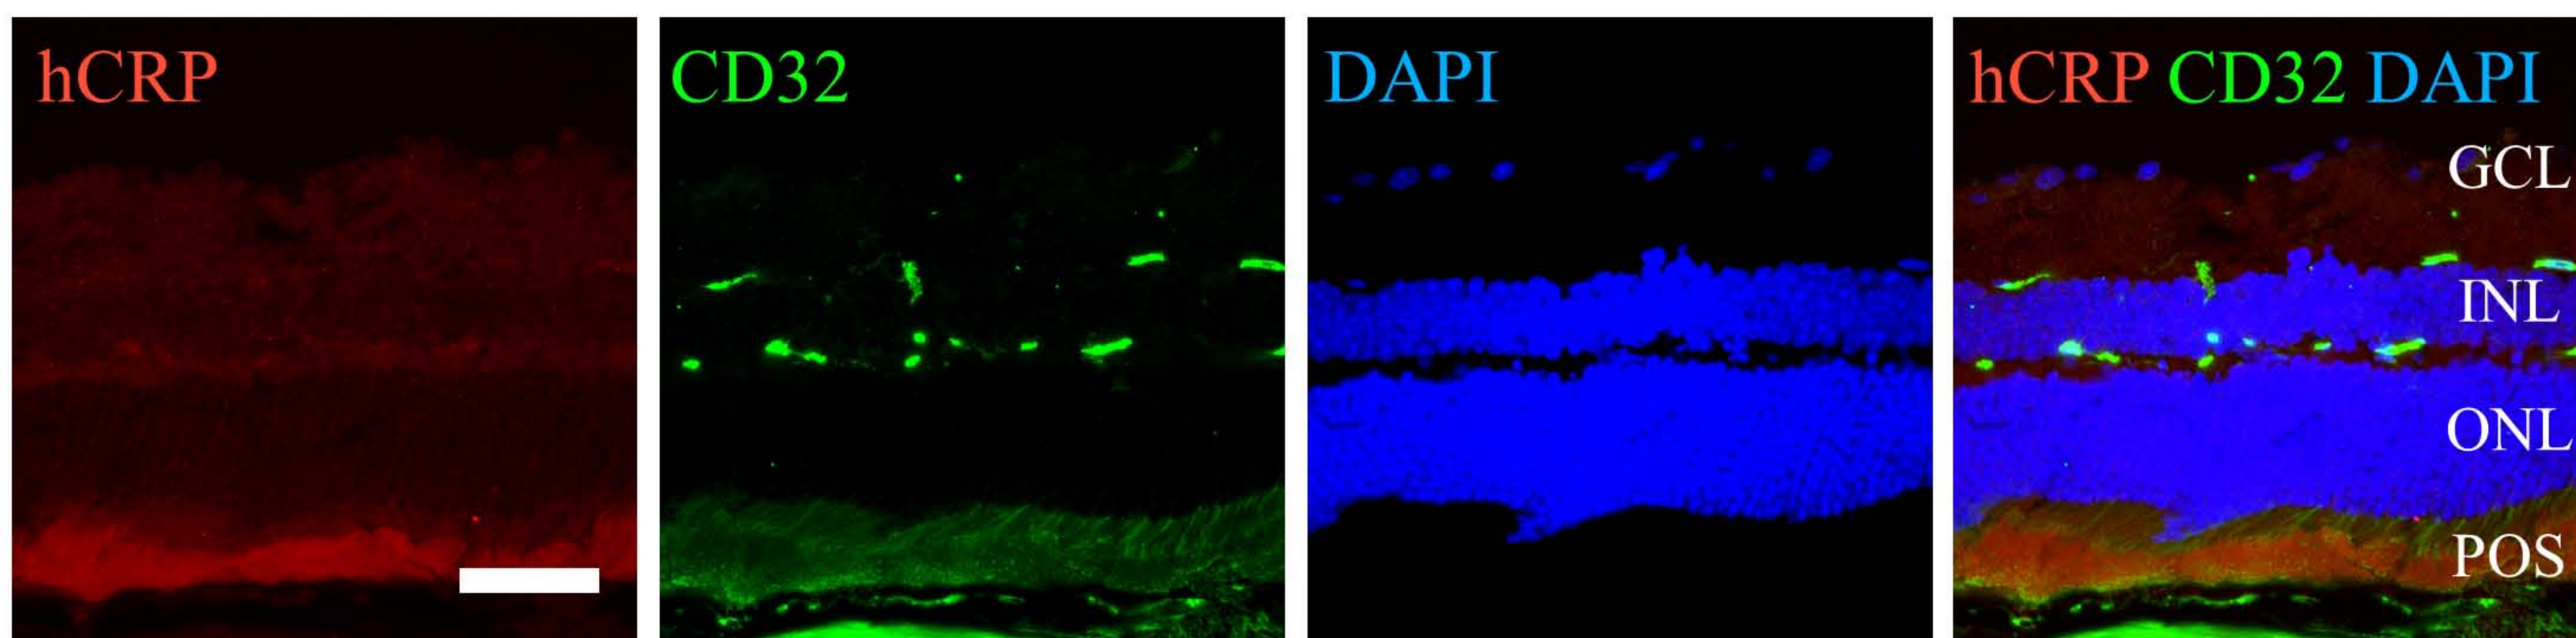

**Supplementary Figure 6. Localization of hCRP and CD32a in the retinal sections.** *A*: Representative images of hCRP (red) and CD32 (green) immunostaining in retinal sections of 6-month-old diabetic hCRP-Tg rats. The nuclei were counterstained with DAPI (blue). GCL: ganglion cell layer, INL: inner nuclear layer, ONL: outer nuclear layer, POS: photoreceptor outer segments. Scale bar = 25  $\mu$ m.

**A**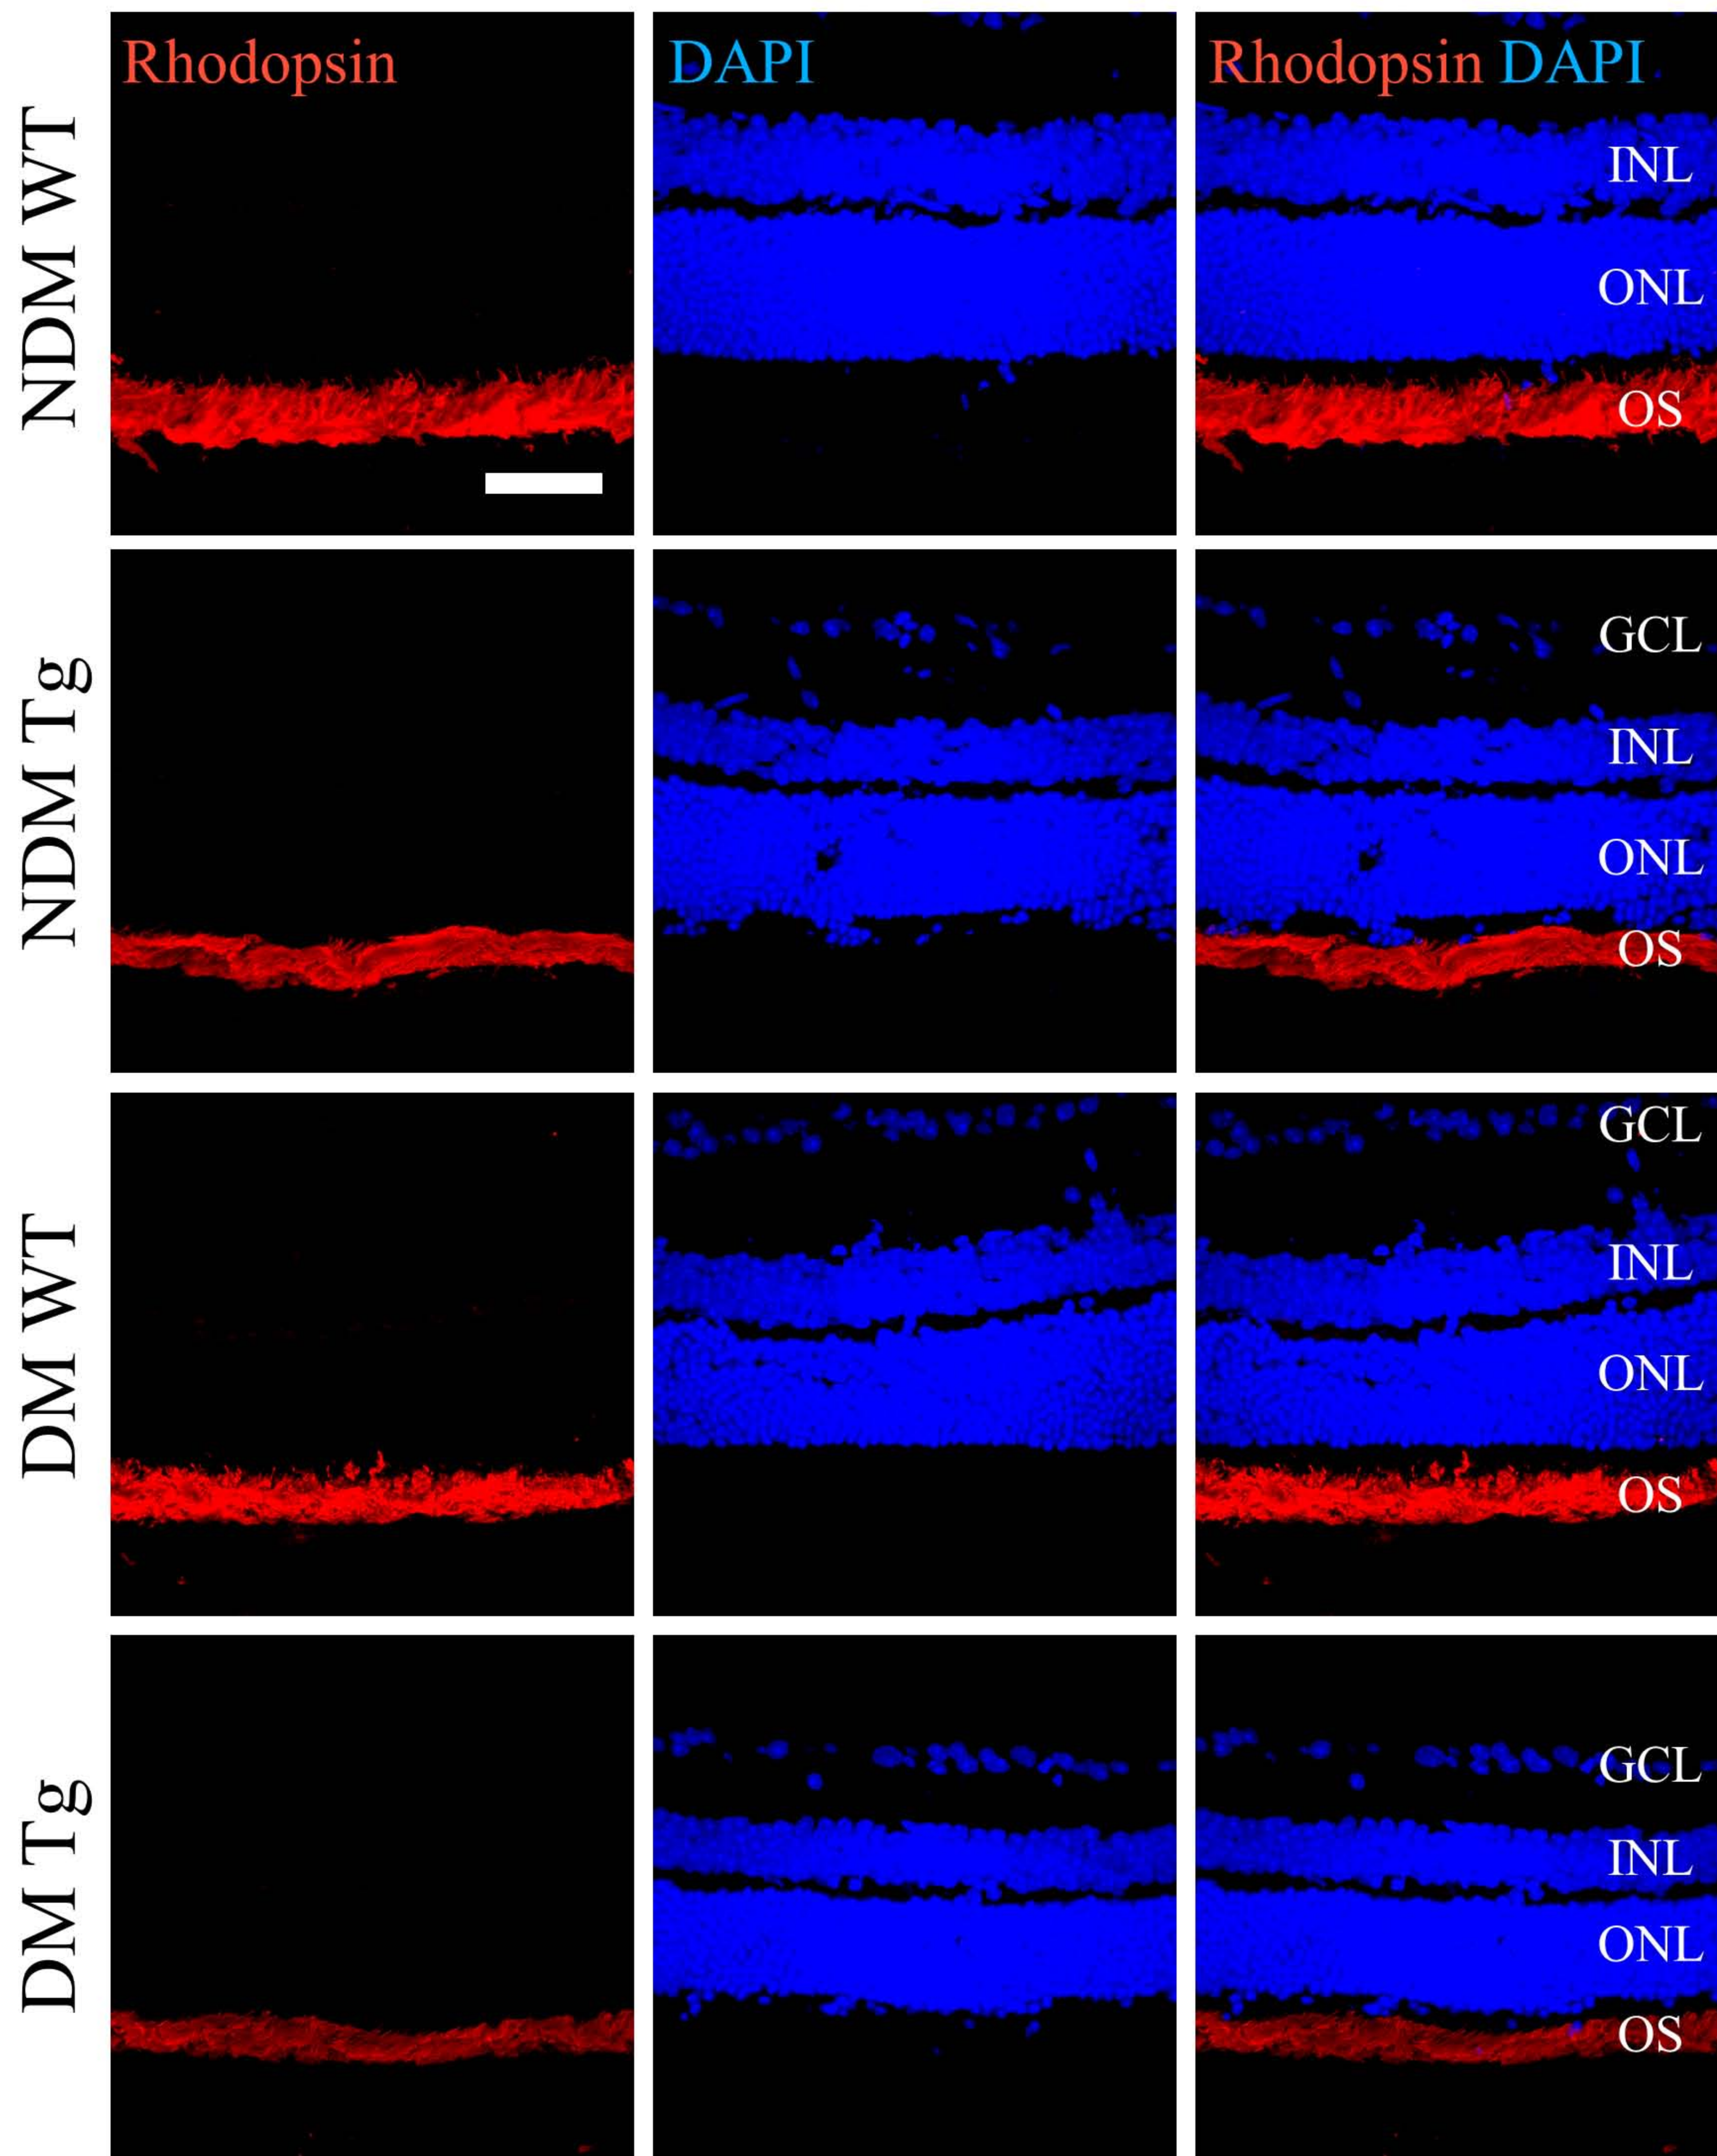**B**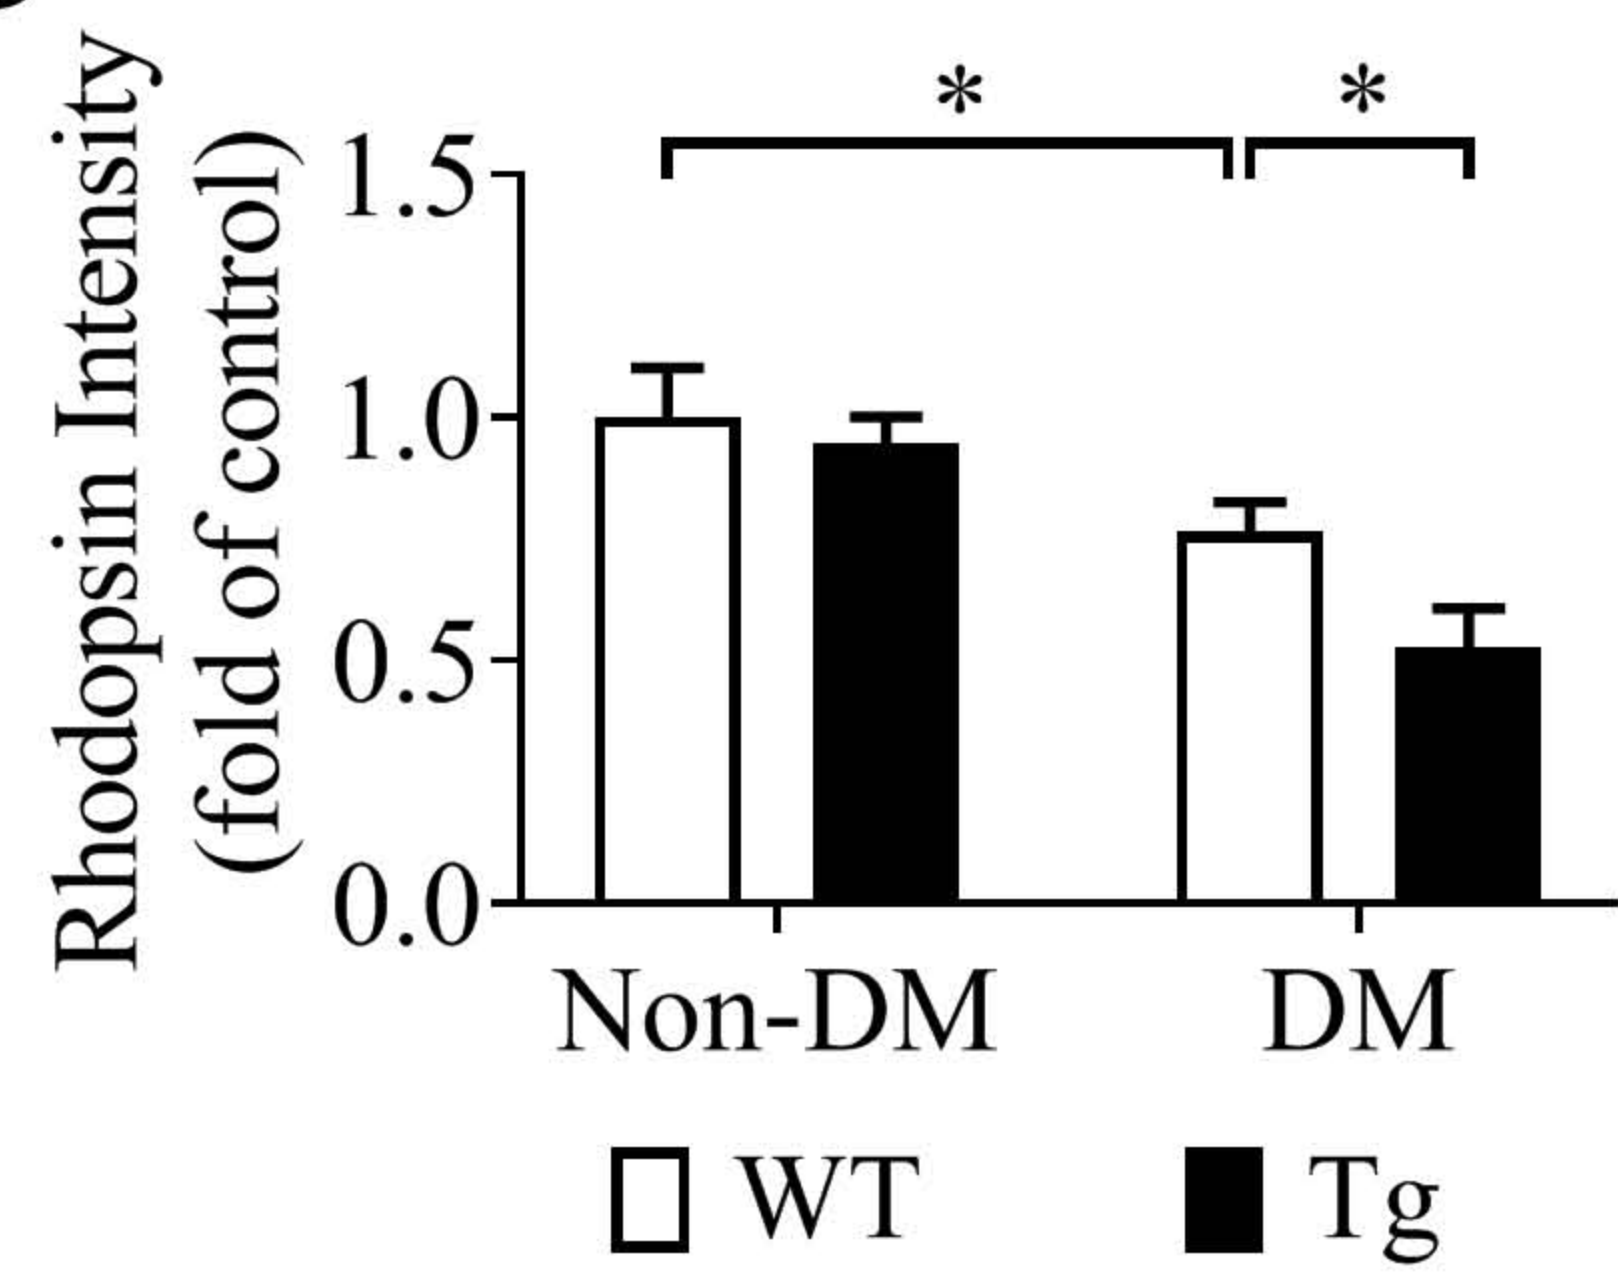

**Supplementary Figure 7. hCRP over-expression promoted diabetes-induced degeneration of rod photoreceptors.** *A:* Representative images of rhodopsin (1D4) immunostaining in the retinal sections of 6-month-old non-diabetic WT rats (NDM WT), non-diabetic hCRP-Tg rats (NDM Tg), diabetic WT rats (DM WT), and diabetic hCRP-Tg rats (DM Tg). *B:* Quantification of rhodopsin signal intensity. GCL: ganglion cell layer, INL: inner nuclear layer, ONL: outer nuclear layer, OS: outer segment. Scale bar = 25  $\mu$ m. Data were presented as mean  $\pm$  SEM (n=6). \* P < 0.05.

**A**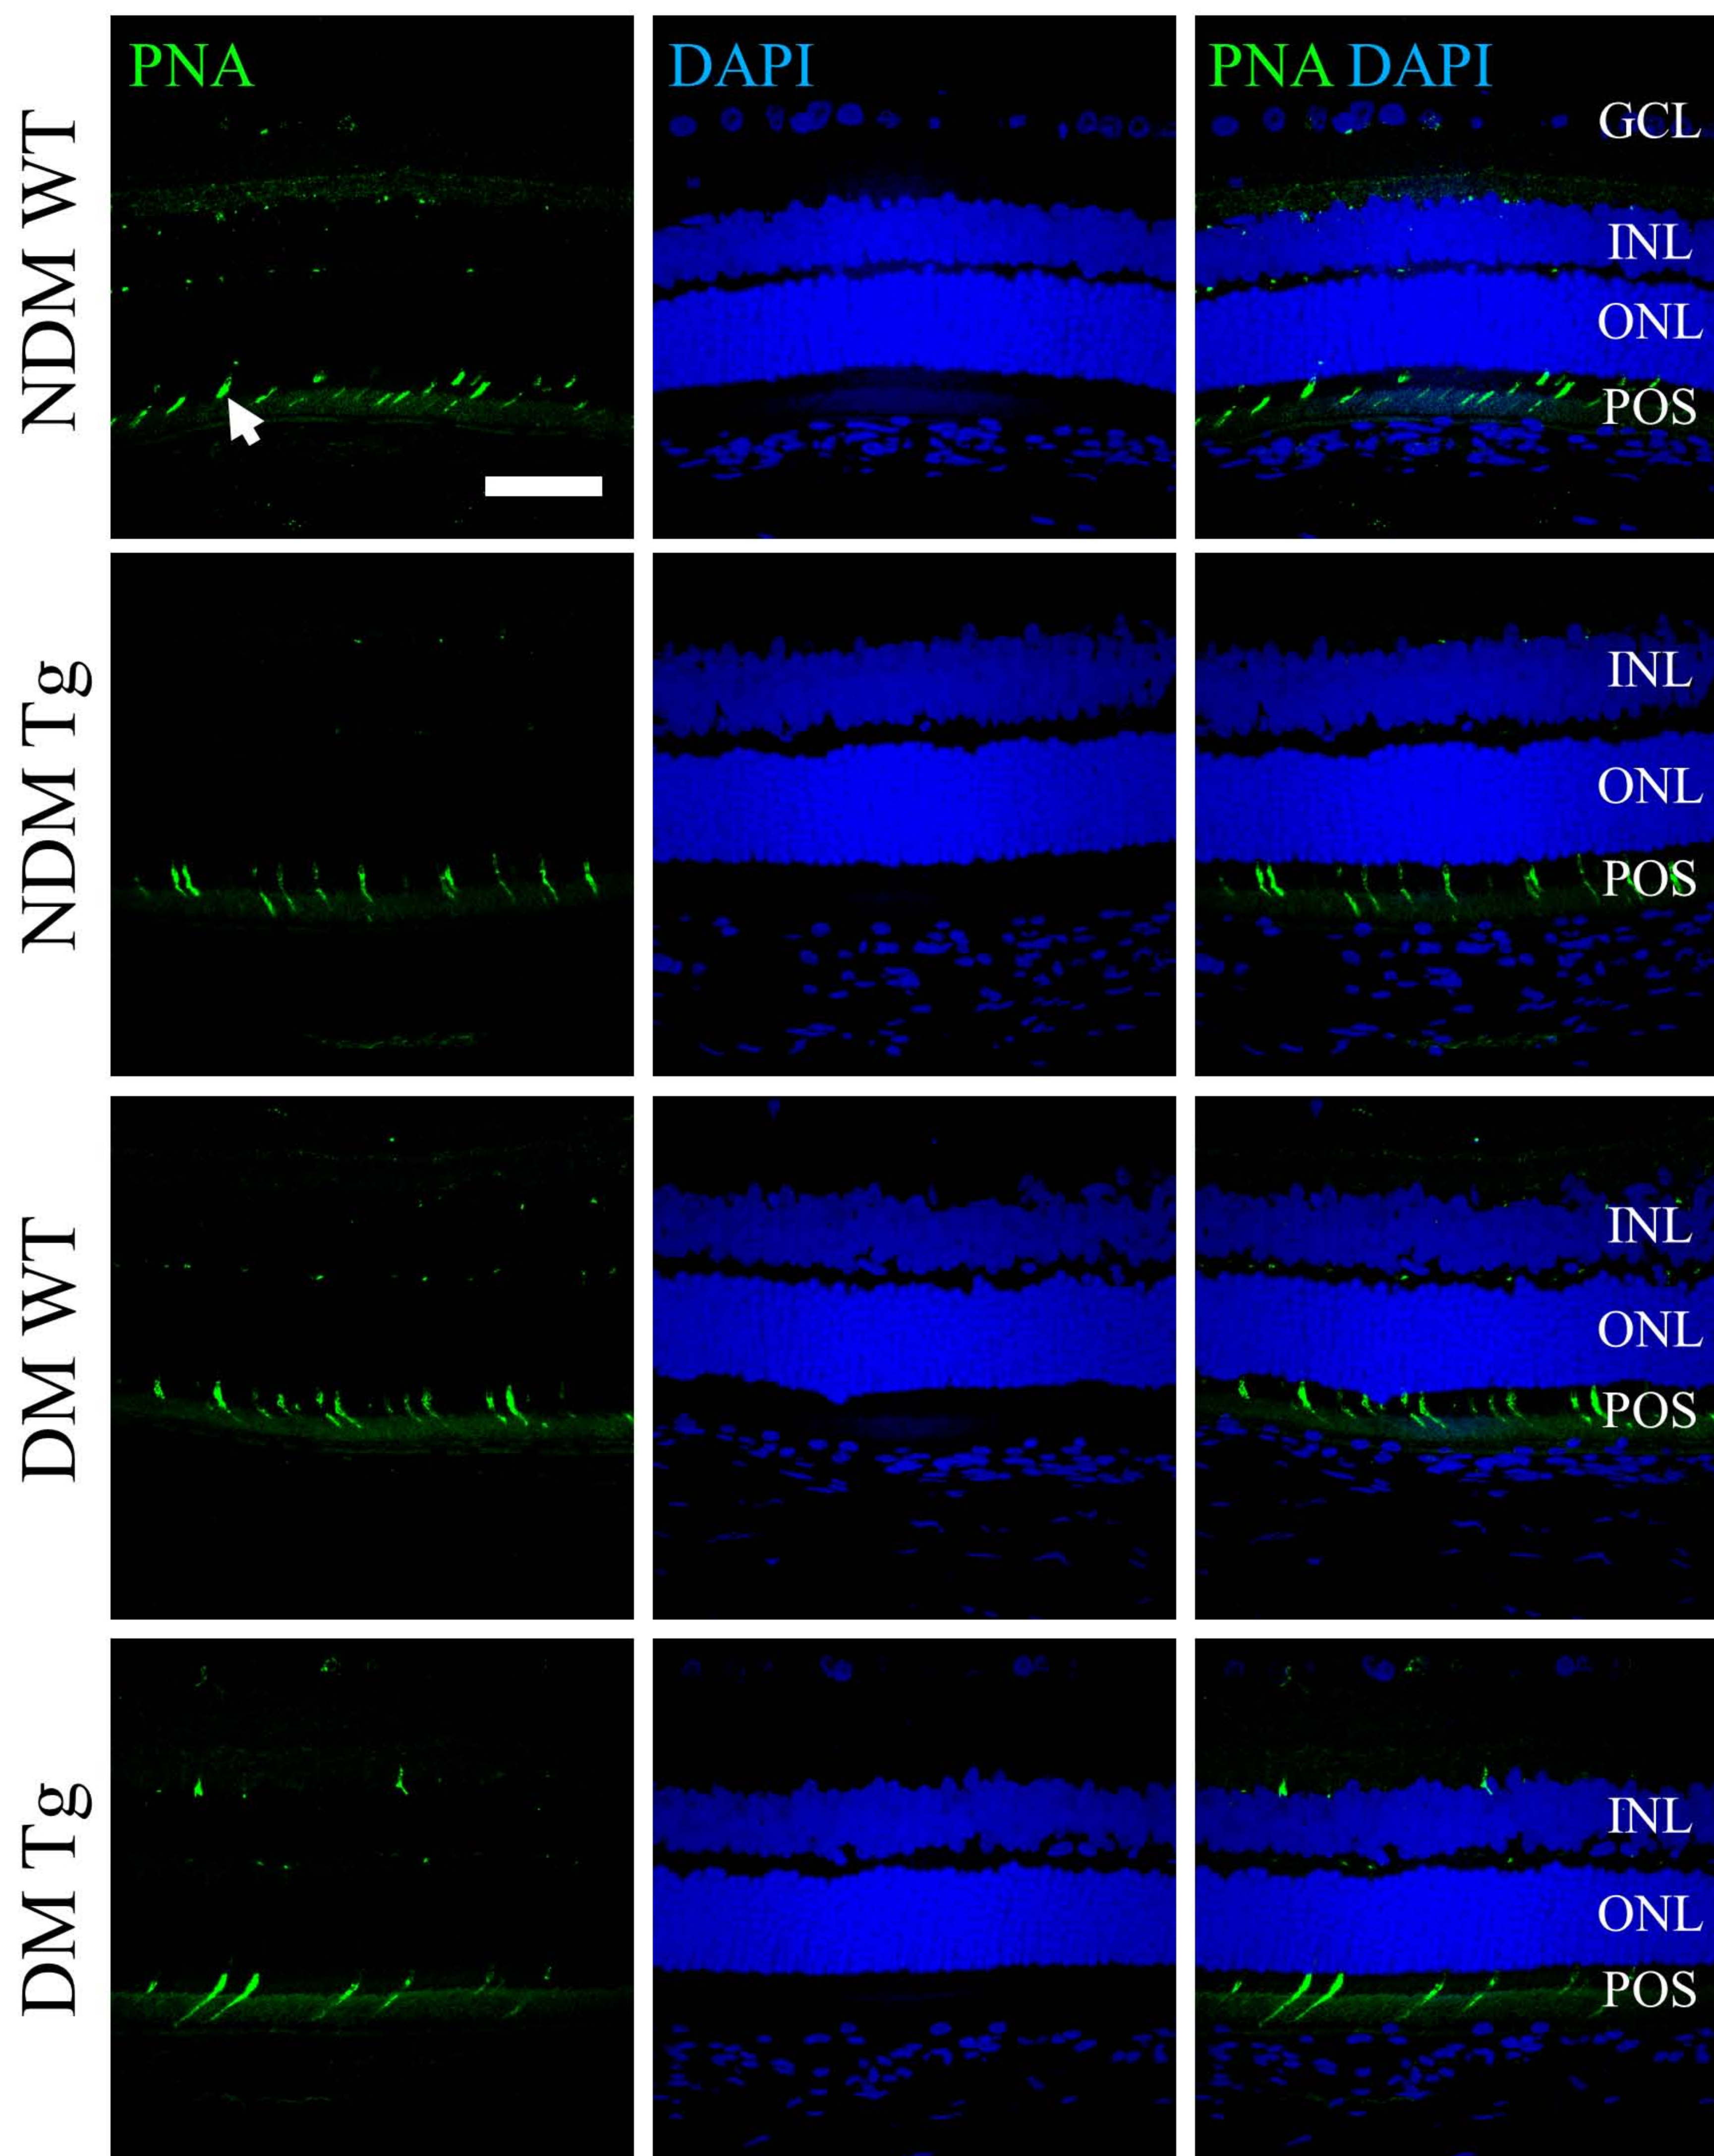**B**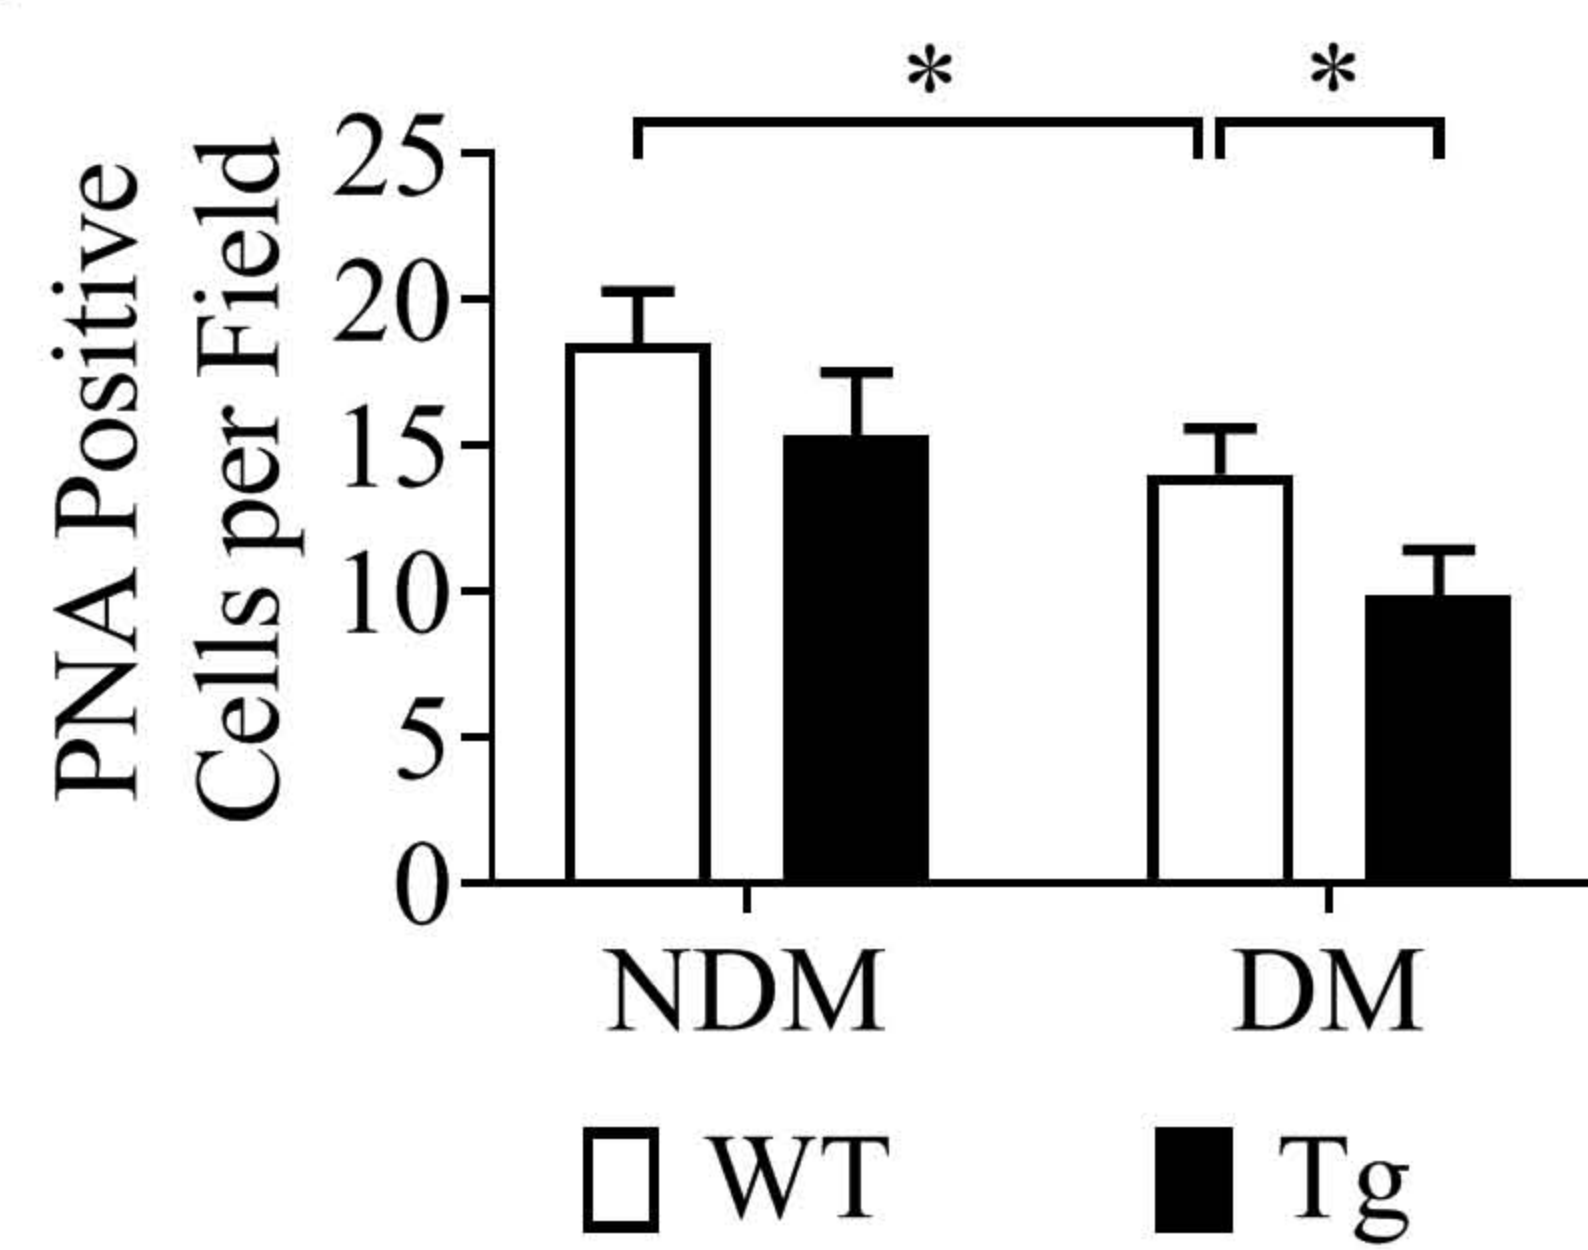

**Supplementary Figure 8. hCRP overexpression promoted diabetes-induced degeneration of cone photoreceptors.** *A:* Representative images of peanut agglutinin (PNA) staining in the retinal sections of 6-month-old non-diabetic WT rats (NDM WT), non-diabetic hCRP-Tg rats (NDM Tg), diabetic WT rats (DM WT), and diabetic hCRP-Tg rats (DM Tg). *B:* Quantification of PNA-labeled cone cells. GCL: ganglion cell layer, INL: inner nuclear layer, ONL: outer nuclear layer, POS: photoreceptor outer segments. White arrowhead indicate the PNA-positive cell. Scale bar = 25  $\mu$ m. Data were presented as mean  $\pm$  SEM (n=6).



1 **Supplemental Table 1: List of antibodies used in this study**

| Antibodies                       | Host & Type | Dilution | Company             | Catalogue No. |
|----------------------------------|-------------|----------|---------------------|---------------|
| Albumin                          | Goat        | 1:1000   | Bethyl Laboratories | A90-134A      |
| Brn-3a                           | Mouse       | 1:100    | Santa Cruz          | sc-8429       |
| CD32                             | Goat        | 1:1000   | R&D                 | AF1875        |
| CD64                             | Rabbit      | 1:1000   | Abcam               | ab203349      |
| Human CRP                        | Rabbit      | 1:1000   | Abcam               | ab32142       |
| ICAM-1                           | Goat        | 1:200    | Santa Cruz          | sc-1511       |
| Peanut Agglutinin                | -           | 1:500    | Vector Laboratories | FL-1071       |
| Phospho-Ikk $\alpha$ / $\beta$   | Rabbit      | 1:500    | Cell Signaling      | 2697          |
| Phospho-NF- $\kappa$ B p65       | Mouse       | 1:500    | Cell Signaling      | 3036          |
| Prox-1                           | Rabbit      | 1:200    | BioLegend           | 925201        |
| Rhodopsin (1D4)                  | Mouse       | 1:1000   | Abcam               | ab5417        |
| TNF- $\alpha$                    | Rabbit      | 1:1000   | Abcam               | ab6671        |
| Total $\beta$ -catenin           | Mouse       | 1:1000   | Santa Cruz          | sc-393501     |
| Total Ikk $\alpha$               | Rabbit      | 1:1000   | Cell Signaling      | 2682          |
| Total Ikk $\beta$                | Rabbit      | 1:1000   | Cell Signaling      | 2678          |
| Total NF- $\kappa$ B p65         | Rabbit      | 1:1000   | Abcam               | ab16502       |
| VEGF                             | Rabbit      | 1:1000   | Abcam               | ab46154       |
| $\beta$ -actin                   | Goat        | 1:2000   | Santa Cruz          | sc-1616       |
| 3-nitrotyrosine                  | Mouse       | 1:100    | Abcam               | ab61392       |
| Anti-goat IgG                    | Horse       | 1:3000   | Vector Laboratories | PI-9500       |
| Anti-mouse IgG                   | Horse       | 1:3000   | Vector Laboratories | PI-2000       |
| Anti-mouse IgG, Alexa Fluor 488  | Donkey      | 1:250    | ThermoFisher        | R37114        |
| Anti-rabbit IgG                  | Goat        | 1:3000   | Vector Laboratories | PI-1000       |
| Anti-rabbit IgG, Alexa Fluor 488 | Donkey      | 1:250    | ThermoFisher        | R37118        |
